# Supplementary material for: Synthesis and triplet sensitization of bis(arylselanyl)BOPHYs; potential application in triplet–triplet annihilation upconversion
Source: Royal Society of Chemistry journal article supplement (doi:10.1039/d1nj00721a), 2021-01-01
Supplement: d1nj00721a1.pdf [file d1nj00721a1.pdf]

## Electronic Supporting Information

### Synthesis and triplet sensitization of bis(arylselanyl)BOPHY; potential application in triplet-triplet annihilation upconversion

Ryohei Hasegawa, Shinji Iwakiri and Yuji Kubo\*

*Department of Applied Chemistry, Graduate School of Urban Environmental Sciences, Tokyo Metropolitan University, 1-1 Minami-Osawa, Hachioji, Tokyo, 192-0397*

#### Table of contents

|                                                                                                                                   |             |
|-----------------------------------------------------------------------------------------------------------------------------------|-------------|
| <b>Fig. S1.</b> Absorption and fluorescence spectra of <b>1</b> in various solvent.....                                           | S-2         |
| <b>Table S1.</b> Photophysical properties of <b>1</b> in various solvent .....                                                    | S-2         |
| <b>Fig. S2.</b> Absorption and fluorescence spectra of <b>2</b> in various solvent.....                                           | S-3         |
| <b>Table S2.</b> Photophysical properties of <b>2</b> in various solvent .....                                                    | S-3         |
| <b>Fig. S3.</b> Absorption and fluorescence spectra of <b>3</b> in various solvent.....                                           | S-4         |
| <b>Table S3.</b> Photophysical properties of <b>3</b> in various solvent .....                                                    | S-4         |
| <b>Fig. S4.</b> Absorption and fluorescence spectra of <b>I<sub>2</sub>BOPHY</b> in various solvent.....                          | S-5         |
| <b>Table S4.</b> Photophysical properties of <b>I<sub>2</sub>BOPHY</b> in various solvent .....                                   | S-5         |
| <b>Fig. S5</b> Lippert-Mataga plot for <b>1</b> , <b>2</b> , <b>3</b> and <b>I<sub>2</sub>BOPHY</b> .....                         | S-5         |
| <b>Fig. S6</b> Solid emission spectra of <b>1</b> , <b>2</b> , <b>3</b> and <b>I<sub>2</sub>BOPHY</b> .....                       | S-6         |
| <b>Table S5.</b> Calculated values for <b>1</b> . .....                                                                           | S-6         |
| <b>Fig. S7.</b> The frontier molecular orbitals of the optimized structures of <b>1</b> .....                                     | S-6         |
| <b>Table S6.</b> Calculated values for <b>2</b> . .....                                                                           | S-7         |
| <b>Fig. S8.</b> The frontier molecular orbitals of the optimized structures of <b>2</b> .....                                     | S-7         |
| <b>Table S7.</b> Calculated values for <b>3</b> . .....                                                                           | S-8         |
| <b>Fig. S9.</b> The frontier molecular orbitals of the optimized structures of <b>3</b> .....                                     | S-8         |
| <b>Table S8.</b> Calculated values for <b>I<sub>2</sub>BOPHY</b> . .....                                                          | S-9         |
| <b>Fig. S10.</b> The frontier molecular orbitals of the optimized structures of <b>I<sub>2</sub>BOPHY</b> .....                   | S-9         |
| <b>Fig. S11.</b> Fitting absorption spectral change for photooxidation of DPBF using <b>1-3</b> , <b>I<sub>2</sub>BOPHY</b> ..... | S-10        |
| <b>Fig. S12.</b> UC emission intensity at 412 nm at different power intensities.....                                              | S-10        |
| <b>Fig. S13– Fig. S25</b> Spectral data of structure assignment of the dyes .....                                                 | S-11 – S-23 |
| Single crystal X-ray diffraction study for <b>1</b> .....                                                                         | S-24 – S-31 |

### Lippert-Mataga plot

$$\Delta f = \frac{D - 1}{2D + 1} - \frac{n^2 - 1}{2n^2 + 1} \quad \tilde{\nu}_{\text{abs}} - \tilde{\nu}_{\text{em}} = \Delta f \frac{2(\mu_{\text{E}} - \mu_{\text{G}})^2}{hcr^3} + \text{const.}$$

$\Delta f$  is the orientational polarisability where  $D$  and  $n$  are dielectric constant and refractive index, respectively. The parameters of  $h$ ,  $c$ , and  $r$  are the Plank's constant, the velocity of light, and the Onsager radius  $r$ , respectively. DFT calculation (B3LYP/6-31G(d,p)) was used to estimate  $r$ . A linear relationship between the Stokes shift ( $\tilde{\nu}_{\text{abs}} - \tilde{\nu}_{\text{em}}$ ) and  $\Delta f$  was obtained (Figure S1) to afford the difference between excited- and ground-state dipole moments.

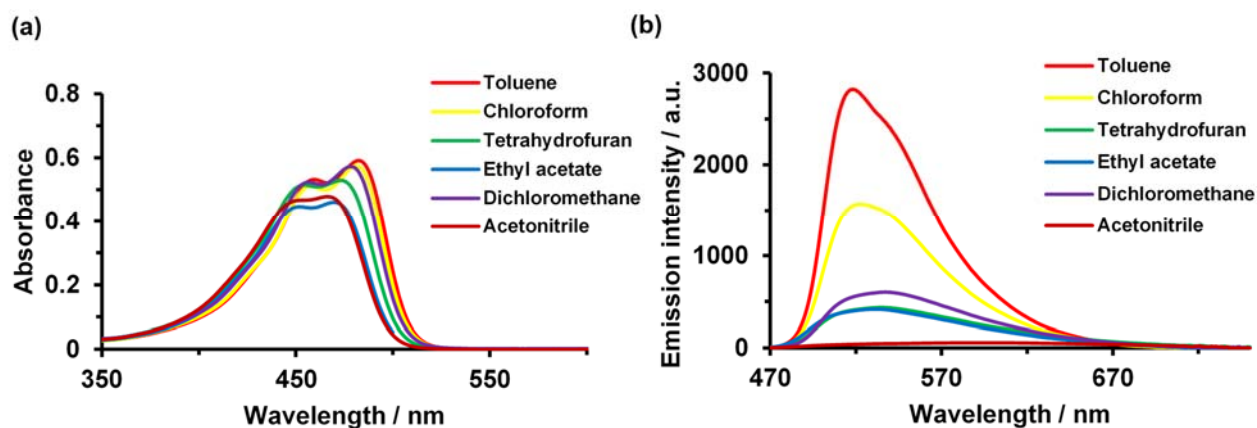

Fig. S1. Absorption (a) fluorescence spectra (b) of **1** in different solvent (10  $\mu\text{M}$ ),  $\lambda_{\text{ex}} = 460 \text{ nm}$ ,  $25^\circ\text{C}$ .

Table S1. Photophysical properties of **1** in different solvents.

| Solvent         | $\lambda_{\text{abs}}^a / \text{nm}$ | $\epsilon^b / \times 10^4 \text{ M}^{-1} \text{ cm}^{-1}$ | $\lambda_{\text{em}}^c / \text{nm}$ | $\Phi_F^d / \%$ | $\Delta\nu^e / \text{cm}^{-1}$ |
|-----------------|--------------------------------------|-----------------------------------------------------------|-------------------------------------|-----------------|--------------------------------|
| Toluene         | 459 / 482                            | 5.36 / 5.93                                               | 519                                 | 9.19            | 1479                           |
| Chloroform      | 457 / 481                            | 5.40 / 6.10                                               | 526                                 | 5.02            | 1779                           |
| Tetrahydrofuran | 454 / 473                            | 5.50 / 5.66                                               | 534                                 | 2.09            | 2415                           |
| Ethyl acetate   | 452 / 470                            | 5.67 / 5.87                                               | 534                                 | 2.00            | 2550                           |
| Dichloromethane | 456 / 478                            | 5.48 / 6.01                                               | 540                                 | 2.11            | 2402                           |
| Acetonitrile    | 454 / 466                            | 5.48 / 5.62                                               | 598                                 | 0.359           | 4737                           |

<sup>a</sup>Maximal absorption wavelength. <sup>b</sup>Molar extinction coefficient at  $10^4 \text{ M}^{-1} \text{ cm}^{-1}$ . <sup>c</sup>Maximal fluorescence wavelength ( $\lambda_{\text{ex}} = 460 \text{ nm}$ ). <sup>d</sup>Fluorescence quantum yields. <sup>e</sup> $\Delta\nu = (1/\lambda_{\text{abs}}) - (1/\lambda_{\text{F}})$ .  $\lambda_{\text{abs}}$  and  $\lambda_{\text{F}}$  correspond to maximal absorption and maximal emission wavelengths, respectively.

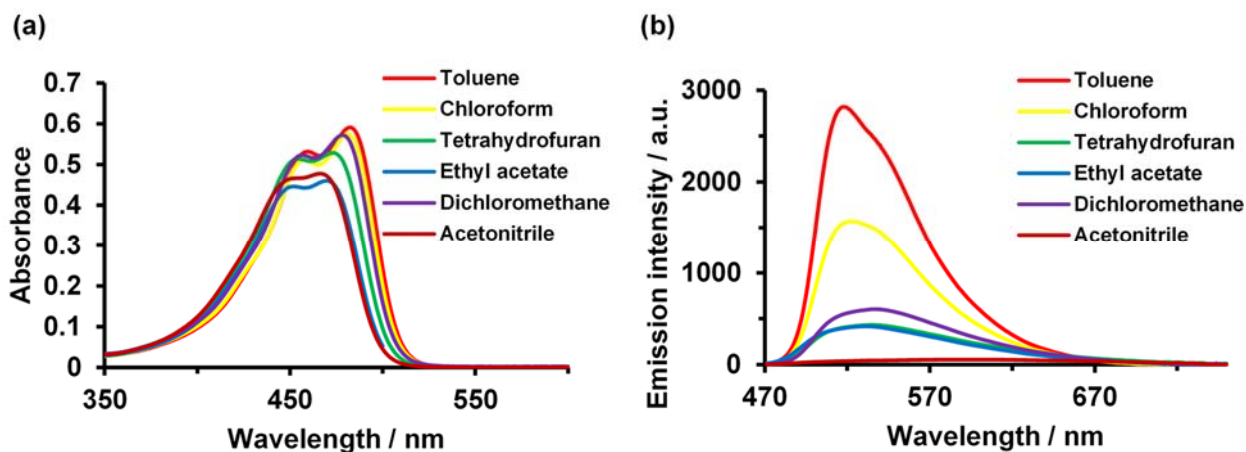

Fig. S2. Absorption (a) fluorescence spectra (b) of **2** in different solvent (10  $\mu$ M),  $\lambda_{\text{ex}} = 460$  nm, 25°C.

Table S2. Photophysical properties of **2** in different solvents.

| Solvent         | $\lambda_{\text{abs}}^a$ / nm | $\epsilon^b / \times 10^4 \text{ M}^{-1} \text{ cm}^{-1}$ | $\lambda_{\text{em}}^c$ / nm | $\Phi_F^d$ / % | $\Delta\nu^e$ / $\text{cm}^{-1}$ |
|-----------------|-------------------------------|-----------------------------------------------------------|------------------------------|----------------|----------------------------------|
| Toluene         | 459 / 482                     | 5.32 / 5.91                                               | 517                          | 8.95           | 1405                             |
| Chloroform      | 458 / 481                     | 5.11 / 5.75                                               | 522                          | 5.36           | 1633                             |
| Tetrahydrofuran | 454 / 473                     | 5.14 / 5.29                                               | 534                          | 1.90           | 2415                             |
| Ethyl acetate   | 454 / 470                     | 4.45 / 4.60                                               | 533                          | 2.00           | 2515                             |
| Dichloromethane | 457 / 478                     | 5.23 / 5.72                                               | 537                          | 2.43           | 2299                             |
| Acetonitrile    | 453 / 466                     | 4.67 / 4.78                                               | 586                          | 0.380          | 4394                             |

<sup>a</sup>Maximal absorption wavelength. <sup>b</sup>Molar extinction coefficient at  $10^4 \text{ M}^{-1} \text{ cm}^{-1}$ . <sup>c</sup>Maximal fluorescence wavelength ( $\lambda_{\text{ex}} = 460$  nm). <sup>d</sup>Fluorescence quantum yields. <sup>e</sup> $\Delta\nu = (1/\lambda_{\text{abs}}) - (1/\lambda_{\text{F}})$ .  $\lambda_{\text{abs}}$  and  $\lambda_{\text{F}}$  correspond to the maximal absorption and maximal emission wavelengths, respectively.

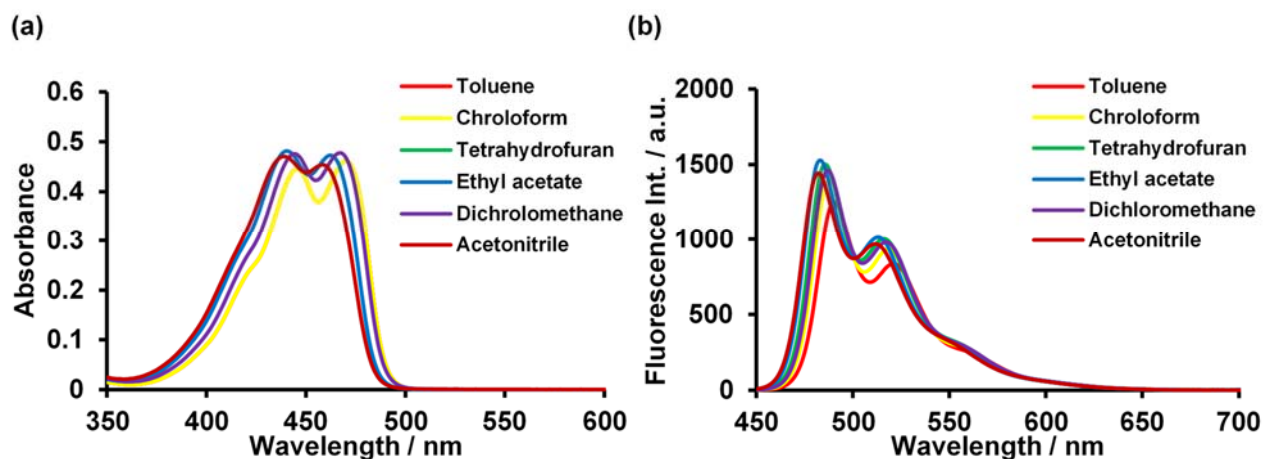

Fig. S3. Absorption (a) fluorescence spectra (b) of **3** in different solvent (10  $\mu$ M),  $\lambda_{\text{ex}} = 440$  nm, 25°C.

Table S3. Photophysical properties of **3** in different solvents.

| Solvent         | $\lambda_{\text{abs}}^a / \text{nm}$ | $\epsilon^b / \times 10^4 \text{ M}^{-1} \text{ cm}^{-1}$ | $\lambda_{\text{em}}^c / \text{nm}$ | $\Phi_F^d / \%$ | $\Delta\nu^e / \text{cm}^{-1}$ |
|-----------------|--------------------------------------|-----------------------------------------------------------|-------------------------------------|-----------------|--------------------------------|
| Toluene         | 447 / 471                            | 4.52 / 4.69                                               | 490 / 521                           | 96.6            | 823                            |
| Chloroform      | 445 / 470                            | 4.45 / 4.62                                               | 488 / 518                           | 96.6            | 785                            |
| Tetrahydrofuran | 443 / 465                            | 4.69 / 4.61                                               | 485 / 516                           | 89.7            | 887                            |
| Ethyl acetate   | 440 / 462                            | 4.81 / 4.73                                               | 483 / 513                           | 82.6            | 941                            |
| Dichloromethane | 444 / 467                            | 4.75 / 4.77                                               | 487 / 517                           | 89.8            | 879                            |
| Acetonitrile    | 438 / 458                            | 4.70 / 4.54                                               | 482 / 511                           | 79.7            | 1087                           |

<sup>a</sup>Maximal absorption wavelength. <sup>b</sup>Molar extinction coefficient at  $10^4 \text{ M}^{-1} \text{ cm}^{-1}$ . <sup>c</sup>Maximal fluorescence wavelength ( $\lambda_{\text{ex}} = 440$  nm). <sup>d</sup>Fluorescence quantum yields. <sup>e</sup> $\Delta\nu = (1/\lambda_{\text{abs}}) - (1/\lambda_{\text{F}})$ .  $\lambda_{\text{abs}}$  and  $\lambda_{\text{F}}$  correspond to maximum absorption and maximum emission wavelengths, respectively.

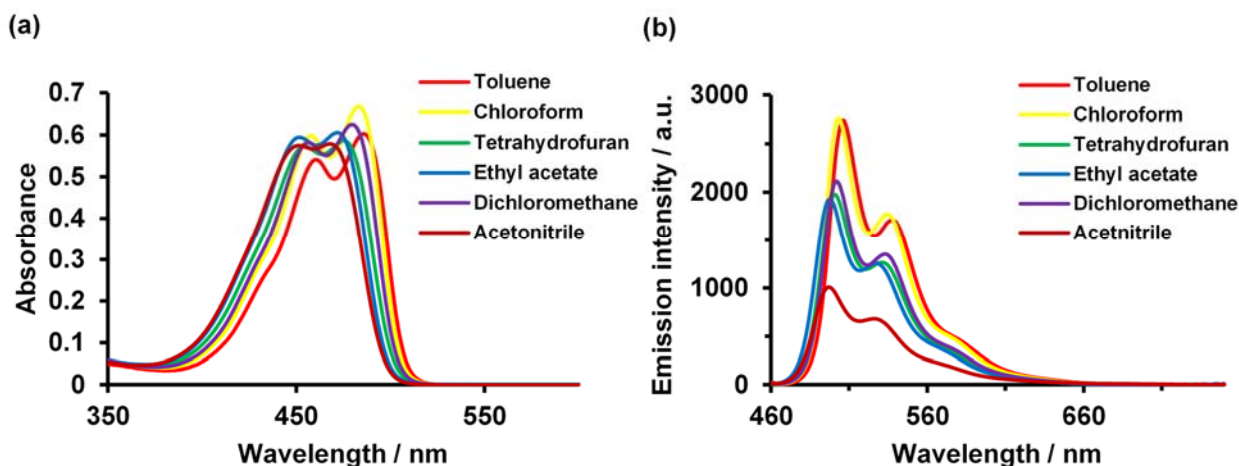

Fig. S4. Absorption (a) fluorescence spectra (b) of **I<sub>2</sub>BOPHY** in different solvent (10  $\mu$ M),  $\lambda_{\text{ex}} = 460$  nm, 25°C.

Table S4. Photophysical properties of **I<sub>2</sub>BOPHY** in different solvents.

| Solvent         | $\lambda_{\text{abs}}^a$ / nm | $\epsilon^b / \times 10^4 \text{ M}^{-1} \text{ cm}^{-1}$ | $\lambda_{\text{em}}^c$ / nm | $\Phi_F^d$ / % | $\Delta\nu^e$ / $\text{cm}^{-1}$ |
|-----------------|-------------------------------|-----------------------------------------------------------|------------------------------|----------------|----------------------------------|
| Toluene         | 460 / 486                     | 5.41 / 6.03                                               | 506 / 537                    | 24.1           | 777                              |
| Chloroform      | 458 / 484                     | 5.99 / 6.67                                               | 503 / 534                    | 19.6           | 780                              |
| Tetrahydrofuran | 455 / 476                     | 5.73 / 5.87                                               | 501 / 531                    | 14.7           | 1048                             |
| Ethyl acetate   | 452 / 472                     | 5.94 / 6.05                                               | 497 / 527                    | 13.4           | 1066                             |
| Dichloromethane | 457 / 480                     | 5.82 / 6.25                                               | 502 / 533                    | 15.4           | 913                              |
| Acetonitrile    | 452 / 468                     | 5.75 / 5.79                                               | 497 / 526                    | 7.31           | 1247                             |

<sup>a</sup>Maximal absorption wavelength. <sup>b</sup>Molar extinction coefficient at  $10^4 \text{ M}^{-1} \text{ cm}^{-1}$ . <sup>c</sup>Maximal fluorescence wavelength ( $\lambda_{\text{ex}} = 460$  nm). <sup>d</sup>Fluorescence quantum yields. <sup>e</sup> $\Delta\nu = (1/\lambda_{\text{abs}}) - (1/\lambda_{\text{F}})$ .  $\lambda_{\text{abs}}$  and  $\lambda_{\text{F}}$  correspond to the maximal absorption and maximal emission wavelengths, respectively.

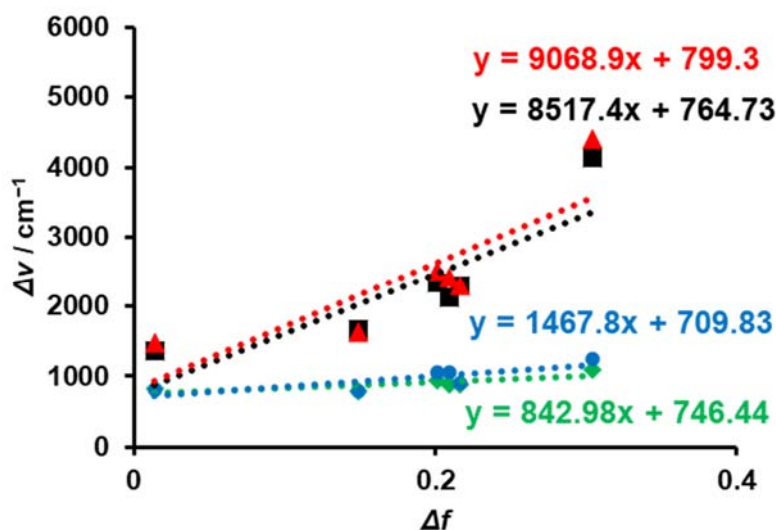

Fig. S5. Lippert-Mataga plot for for **1** (■), **2** (▲), **3** (◆) and **I<sub>2</sub>BOPHY** (●).

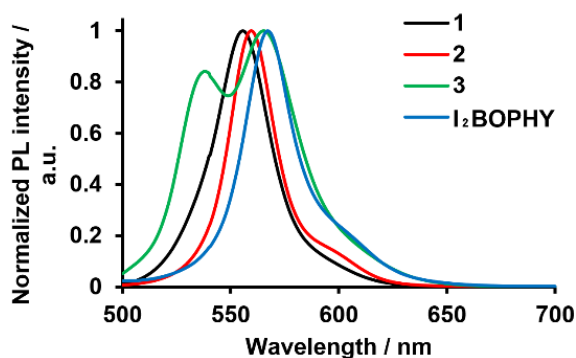

**Fig. S6.** Fluorescence spectra of **1**, **2**, **3** and **I<sub>2</sub>BOPHY** in the solid state.  $\lambda_{ex} = 440$  nm for **3**.  $\lambda_{ex} = 460$  nm for **1**, **2** and **I<sub>2</sub>BOPHY**, 25 °C.

**Table S5.** Calculated values of excited wavelength ( $\lambda_{calcd}$ ), oscillator strength ( $f$ ) and molecular orbital (MO) transition assignment for selected transition energies for **1**.

| State                 | $\lambda_{(calcd.)}$ / nm | $E$ / eV | $f_{(calcd.)}$ | Calculated assignment <sup>a</sup> |
|-----------------------|---------------------------|----------|----------------|------------------------------------|
| $S_0 \rightarrow S_1$ | 468.8                     | 2.64     | 0.2555         | HOMO-2 $\rightarrow$ LUMO (2.7%)   |
|                       |                           |          |                | HOMO $\rightarrow$ LUMO (95.9%)    |
| $S_0 \rightarrow S_2$ | 460.9                     | 2.69     | 0.0026         | HOMO-1 $\rightarrow$ LUMO (98.2%)  |
| $S_0 \rightarrow S_3$ | 418.0                     | 2.97     | 0.9713         | HOMO-2 $\rightarrow$ LUMO (96.4%)  |
|                       |                           |          |                | HOMO $\rightarrow$ LUMO (2.8%)     |
| $S_0 \rightarrow S_4$ | 339.4                     | 3.65     | 0.0002         | HOMO-3 $\rightarrow$ LUMO (70.3%)  |
|                       |                           |          |                | HOMO-2 $\rightarrow$ LUMO+1 (4.7%) |
|                       |                           |          |                | HOMO $\rightarrow$ LUMO+1 (21.0%)  |

<sup>a</sup>Data given in parentheses are  $2 \times (\text{CI coefficient})^2 \times 100\%$ ; see the reference: M. Asgari, H. R. Memarian and H. Sabzyan, *J. Mol. Struct.*, 2020, **1207**, 127820.

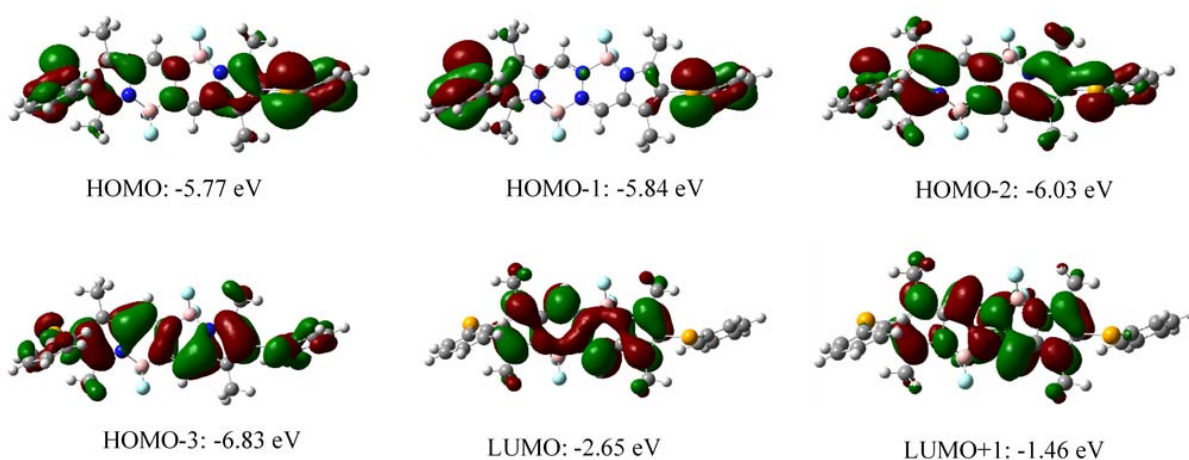

**Fig. S7.** The frontier molecular orbitals of the optimized structures of **1**.

**Table S6.** Calculated values of excited wavelength ( $\lambda_{\text{calcd}}$ ), oscillator strength ( $f$ ) and molecular orbital (MO) transition assignment for selected transition energies for **2**.

| State                 | $\lambda_{\text{(calcd.)}} / \text{nm}$ | $E / \text{eV}$ | $f_{\text{(calcd.)}}$ | Calculated assignment <sup>a</sup>  |
|-----------------------|-----------------------------------------|-----------------|-----------------------|-------------------------------------|
| $S_0 \rightarrow S_1$ | 455.0                                   | 2.73            | 0.4278                | HOMO-2 $\rightarrow$ LUMO (4.0%)    |
|                       |                                         |                 |                       | HOMO $\rightarrow$ LUMO (94.1%)     |
| $S_0 \rightarrow S_2$ | 440.6                                   | 2.81            | 0.0384                | HOMO-1 $\rightarrow$ LUMO (96.2%)   |
| $S_0 \rightarrow S_3$ | 412.8                                   | 3.00            | 0.7551                | HOMO-2 $\rightarrow$ LUMO (93.0%)   |
|                       |                                         |                 |                       | HOMO $\rightarrow$ LUMO (4.6%)      |
| $S_0 \rightarrow S_4$ | 337.5                                   | 3.67            | 0.0001                | HOMO-3 $\rightarrow$ LUMO (70.0%)   |
|                       |                                         |                 |                       | HOMO-2 $\rightarrow$ LUMO+1 (25.2%) |

<sup>a</sup>Data given in parentheses are  $2 \times (\text{CI coefficient})^2 \times 100\%$ ; see the reference: M. Asgari, H. R. Memarian and H. Sabzyan, *J. Mol. Struct.*, 2020, **1207**, 127820.

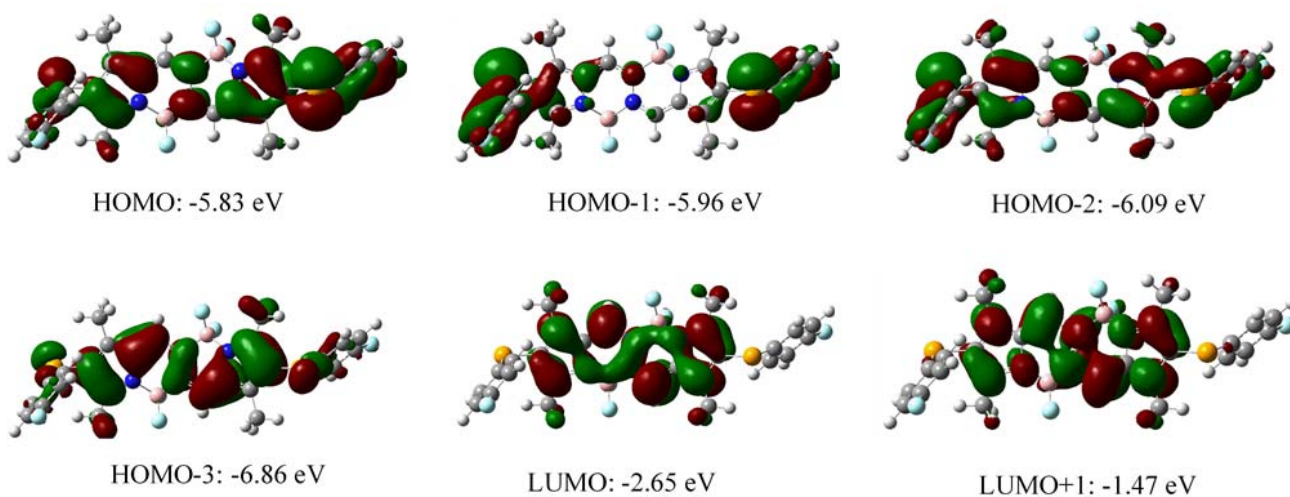

**Fig. S8.** The frontier molecular orbitals of the optimized structures of **2**.

**Table S7.** Calculated values of excited wavelength ( $\lambda_{\text{calcd}}$ ), oscillator strength ( $f$ ) and molecular orbital (MO) transition assignment for selected transition energies for **3**.

| State                          | $\lambda_{\text{(calcd.)}} / \text{nm}$ | $E / \text{eV}$ | $f_{\text{(calcd.)}}$ | Calculated assignment <sup>a</sup>                                      |
|--------------------------------|-----------------------------------------|-----------------|-----------------------|-------------------------------------------------------------------------|
| S <sub>0</sub> →S <sub>1</sub> | 417.0                                   | 2.97            | 0.9089                | HOMO → LUMO (100%)                                                      |
| S <sub>0</sub> →S <sub>2</sub> | 335.4                                   | 3.70            | 0.0000                | HOMO-2 → LUMO (3.84%)<br>HOMO-1 → LUMO (75.7%)<br>HOMO → LUMO+1 (2.50%) |
| S <sub>0</sub> →S <sub>3</sub> | 322.0                                   | 3.85            | 0.0013                | HOMO-2 → LUMO (84.6%)<br>HOMO → LUMO+1 (14.8%)                          |
| S <sub>0</sub> →S <sub>4</sub> | 319.3                                   | 3.88            | 0.0694                | HOMO-3 → LUMO (99.0%)                                                   |

<sup>a</sup>Data given in parentheses are  $2 \times (\text{CI coefficient})^2 \times 100\%$ ; see the reference: M. Asgari, H. R. Memarian and H. Sabzyan, J. Mol. Struct., 2020, 1207, 127820.

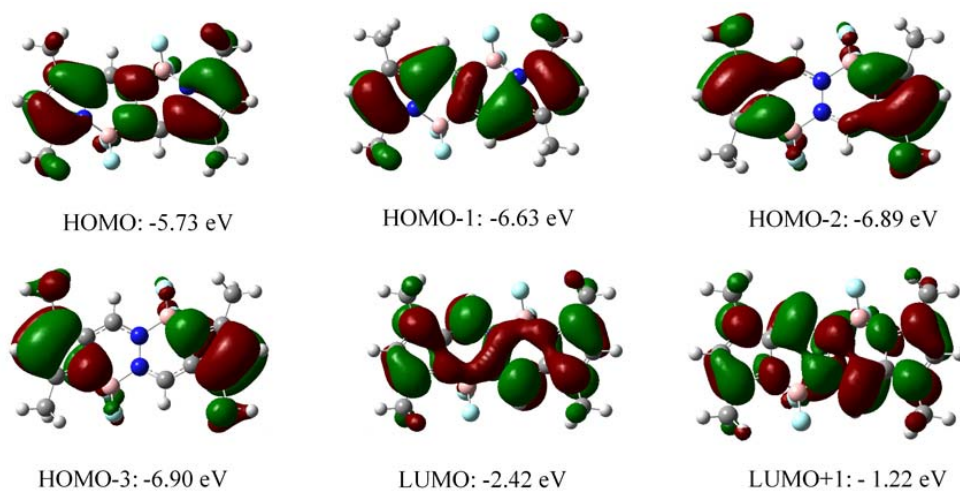

**Fig. S9.** The frontier molecular orbitals of the optimized structures of **3**.



**Table S8.** Calculated values of excited wavelength ( $\lambda_{\text{calcd}}$ ), oscillator strength ( $f$ ) and molecular orbital (MO) transition assignment for selected transition energies for **I<sub>2</sub>-BOPHY**.

| State                          | $\lambda_{\text{(calcd.)}} / \text{nm}$ | $E / \text{eV}$ | $f_{\text{(calcd.)}}$ | Calculated assignment <sup>a</sup>             |
|--------------------------------|-----------------------------------------|-----------------|-----------------------|------------------------------------------------|
| S <sub>0</sub> →S <sub>1</sub> | 409.0                                   | 3.03            | 0.8409                | HOMO → LUMO (98.2%)                            |
| S <sub>0</sub> →S <sub>2</sub> | 371.0                                   | 3.34            | 0.0001                | HOMO-1 → LUMO (95.3%)<br>HOMO → LUMO+1 (2.09%) |
| S <sub>0</sub> →S <sub>3</sub> | 345.0                                   | 3.59            | 0.1732                | HOMO-2 → LUMO (97.3%)                          |
| S <sub>0</sub> →S <sub>4</sub> | 321.3                                   | 3.86            | 0.0000                | HOMO-3 → LUMO (58.7%)<br>HOMO → LUMO+1 (40.9%) |

<sup>a</sup>Data given in parentheses are  $2 \times (\text{CI coefficient})^2 \times 100\%$ ; see the reference: M. Asgari, H. R. Memarian and H. Sabzyan, *J. Mol. Struct.*, 2020, **1207**, 127820.

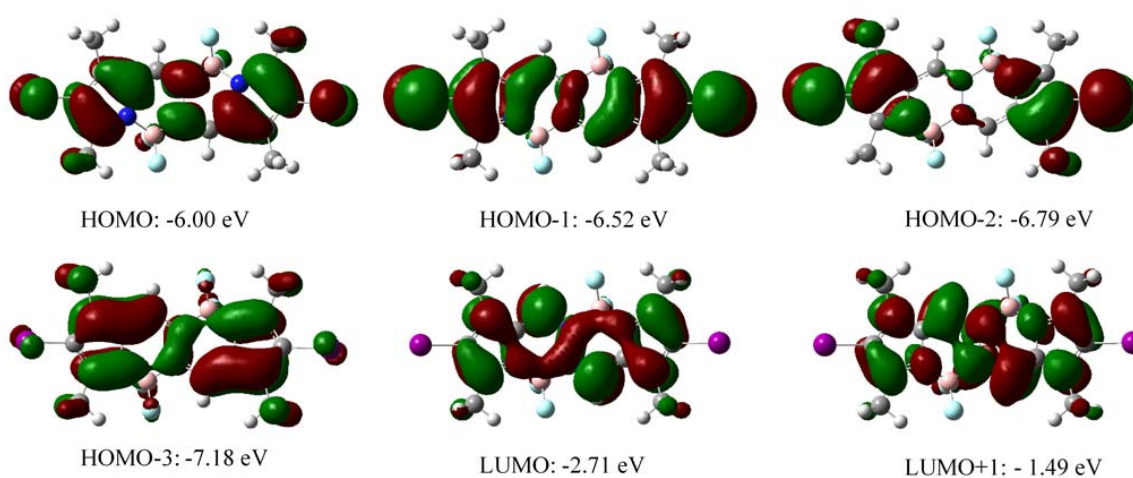

**Fig. S10.** The frontier molecular orbitals of the optimized structures of **I<sub>2</sub>BOPHY**.

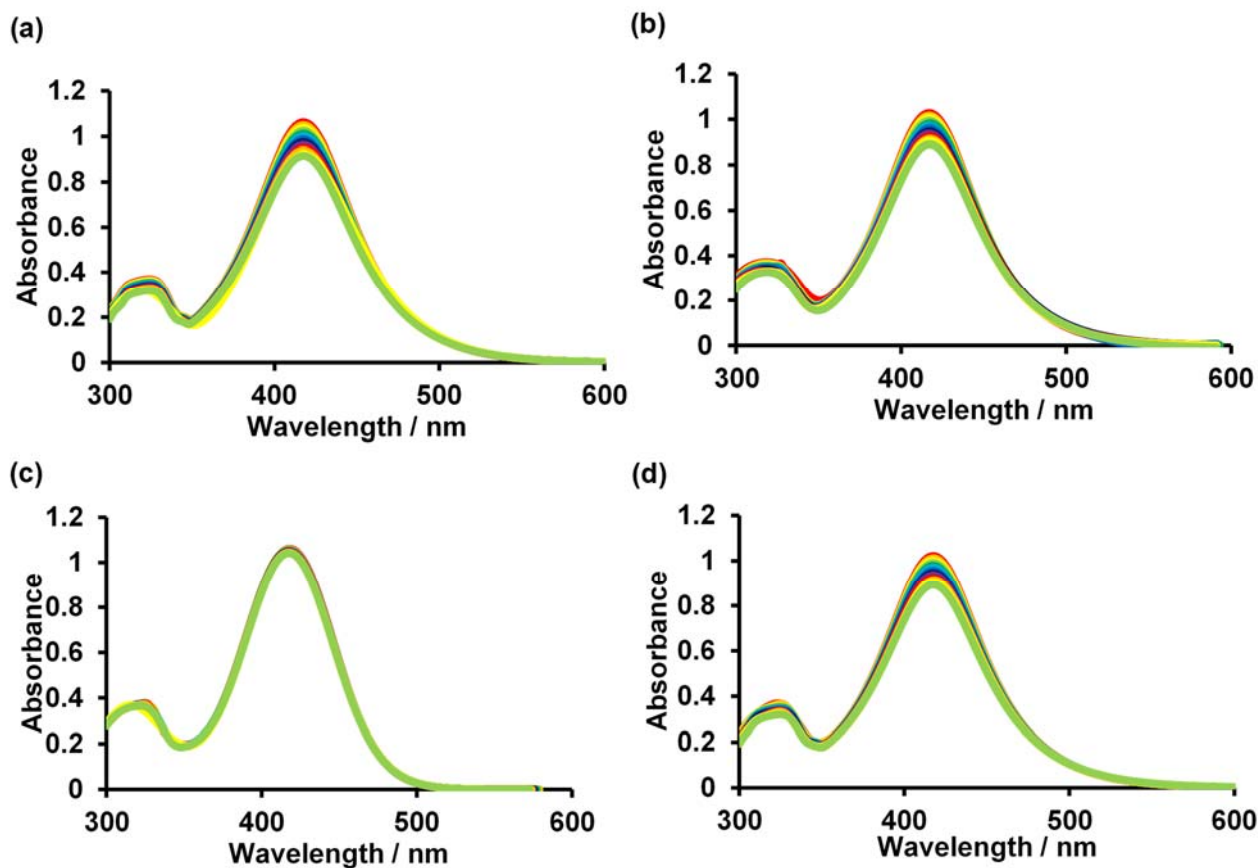

Fig. S11. Fitting absorption spectral change for photooxidation of DPBF (40  $\mu\text{M}$ ) using (a) **1**, (b) **2** (c) **3**, (d) **I<sub>2</sub>BOPHY** as a photosensitizer.

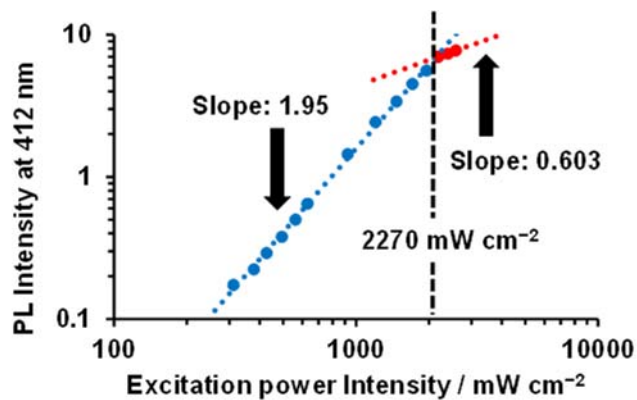

Fig. S12. UC emission intensity at 412 nm at different power intensities. [**1**] = 10  $\mu\text{M}$ , [perylene] = 30  $\mu\text{M}$  in deaerated toluene upon irradiation with a 524 nm laser (310 ~ 2600  $\text{mW cm}^{-2}$ ).

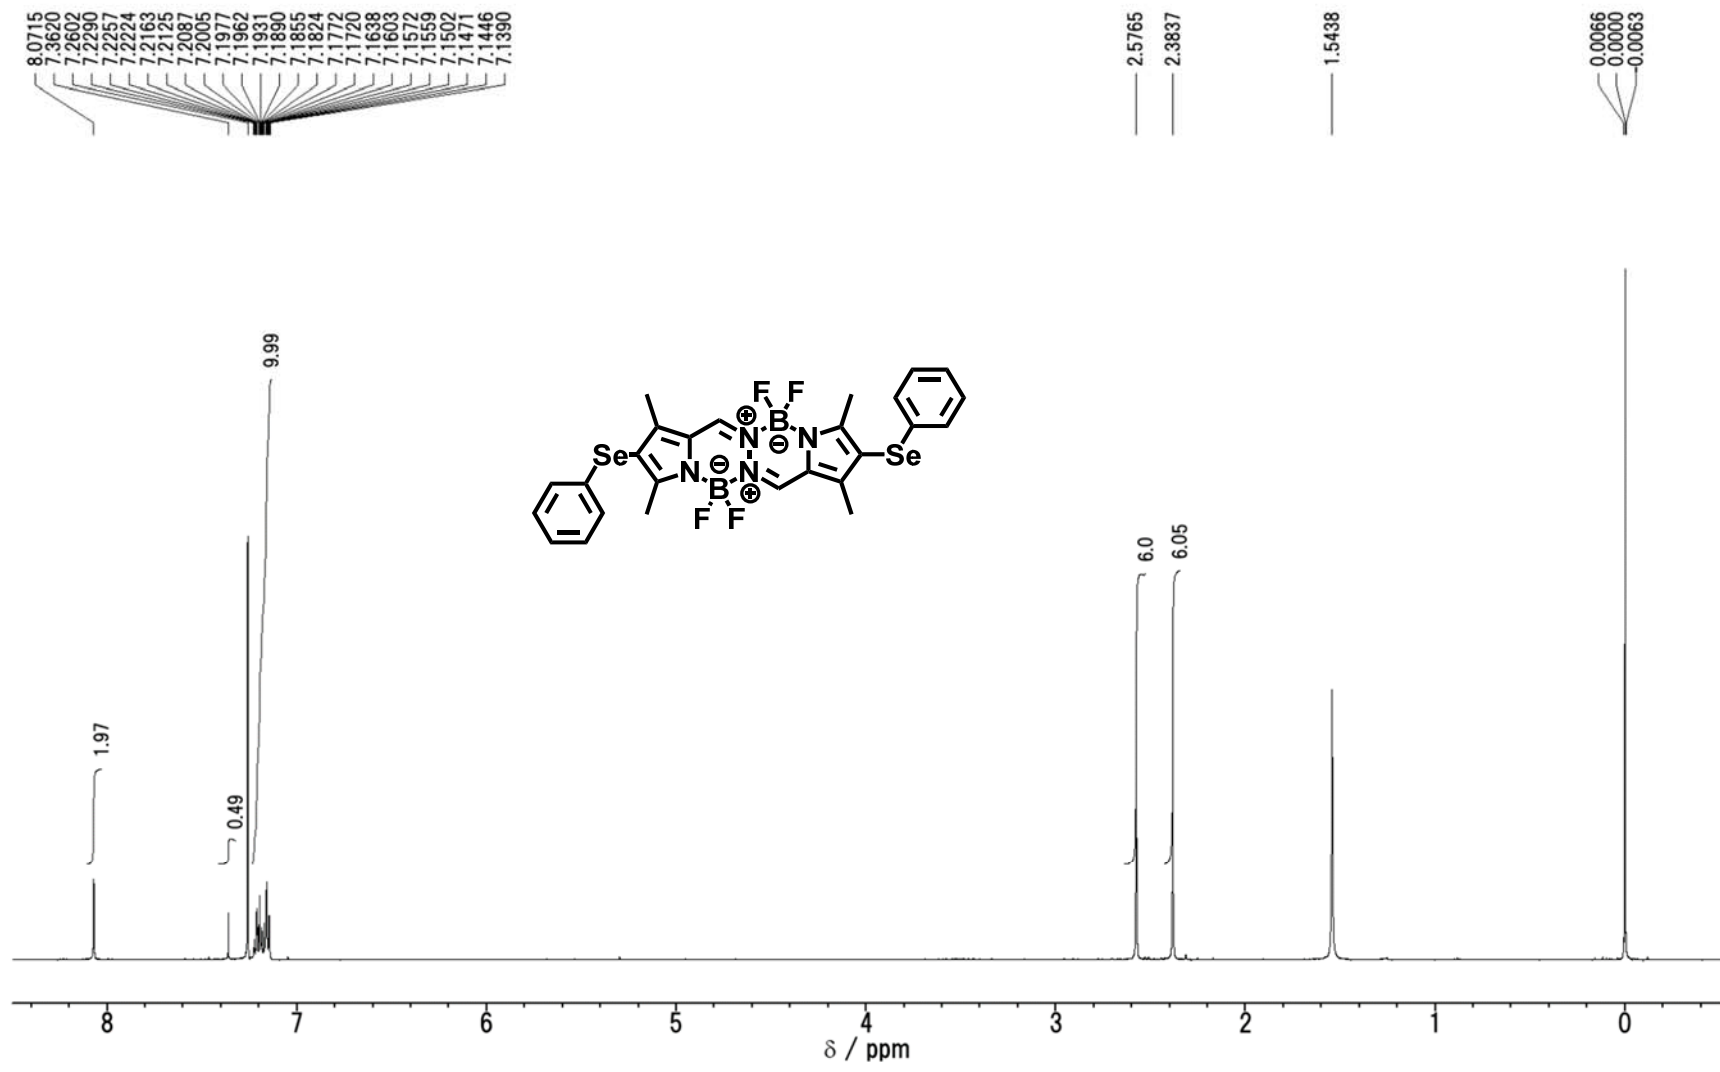

Fig. S13. <sup>1</sup>H NMR spectrum of **1** (500 MHz) in CDCl<sub>3</sub>.

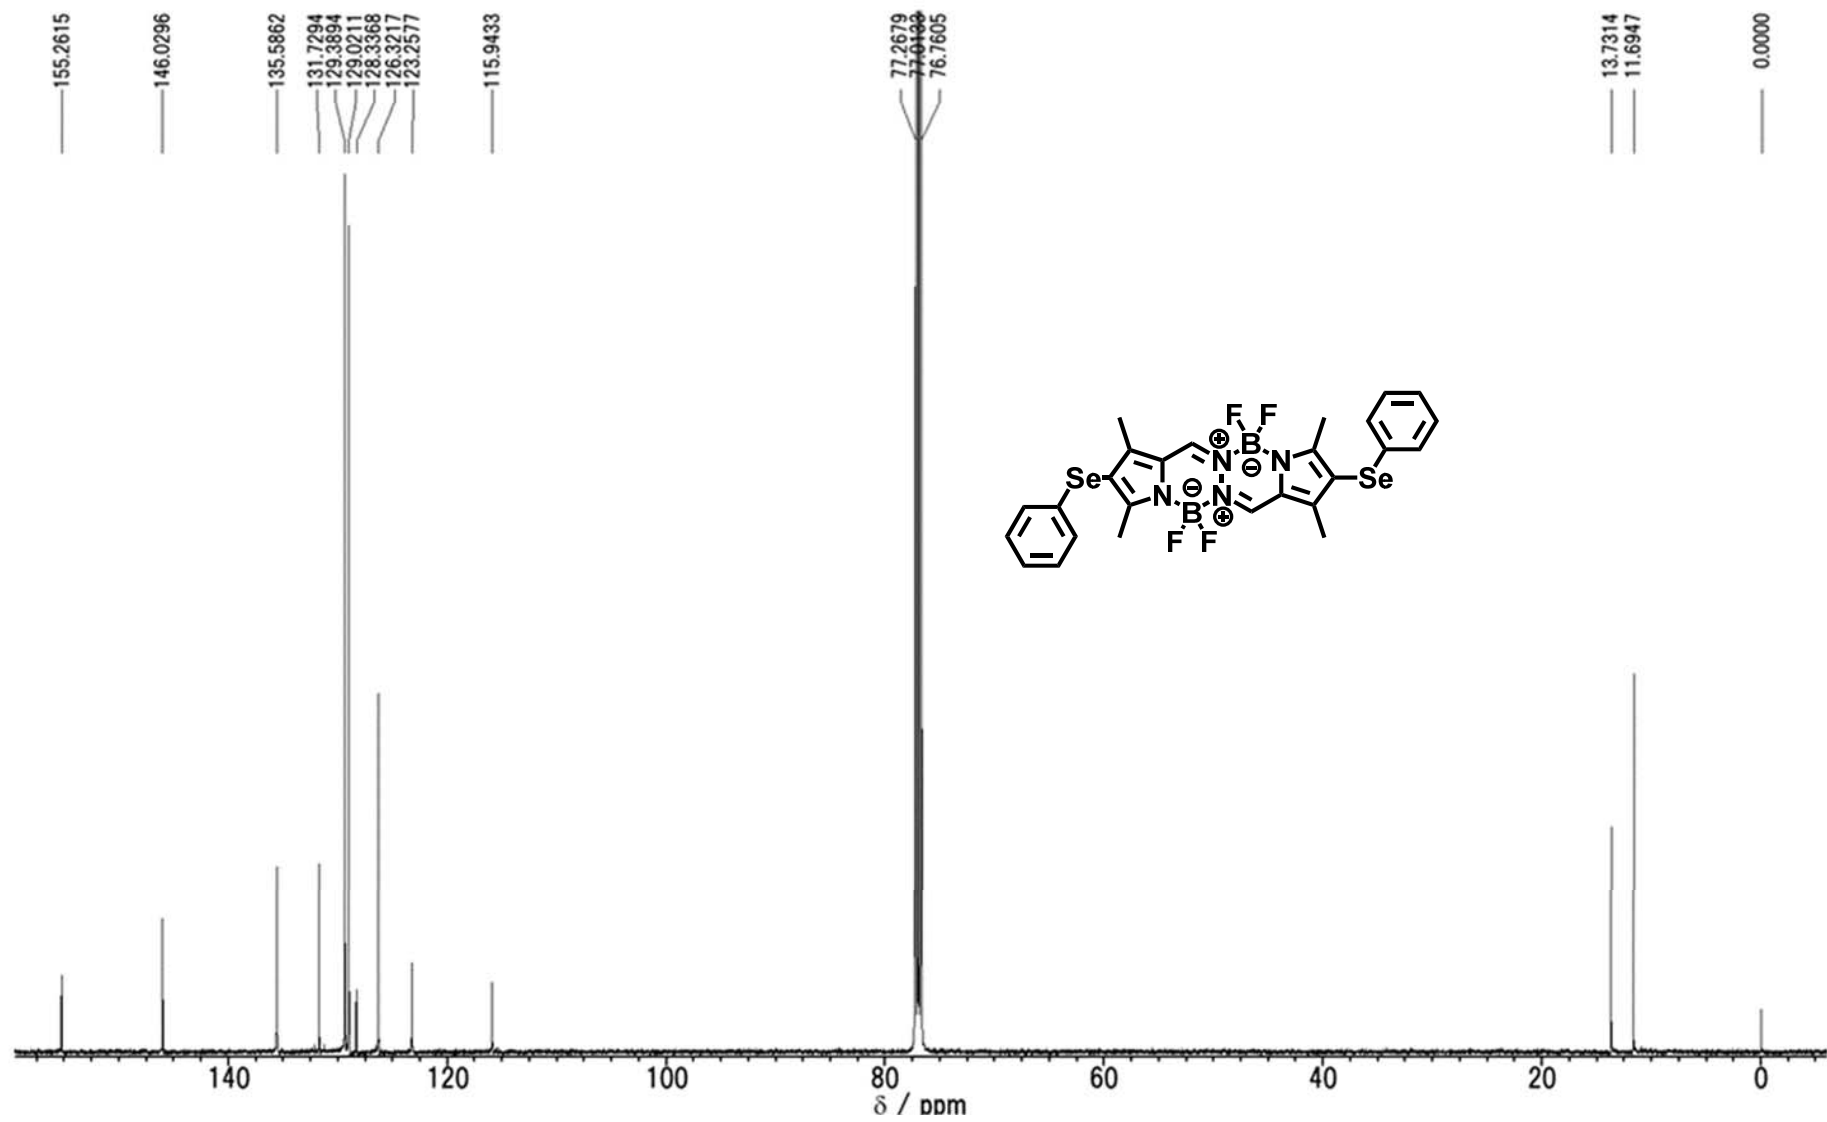

Fig. S14.  $^{13}\text{C}$  NMR spectrum of **1** (126 MHz) in  $\text{CDCl}_3$ .

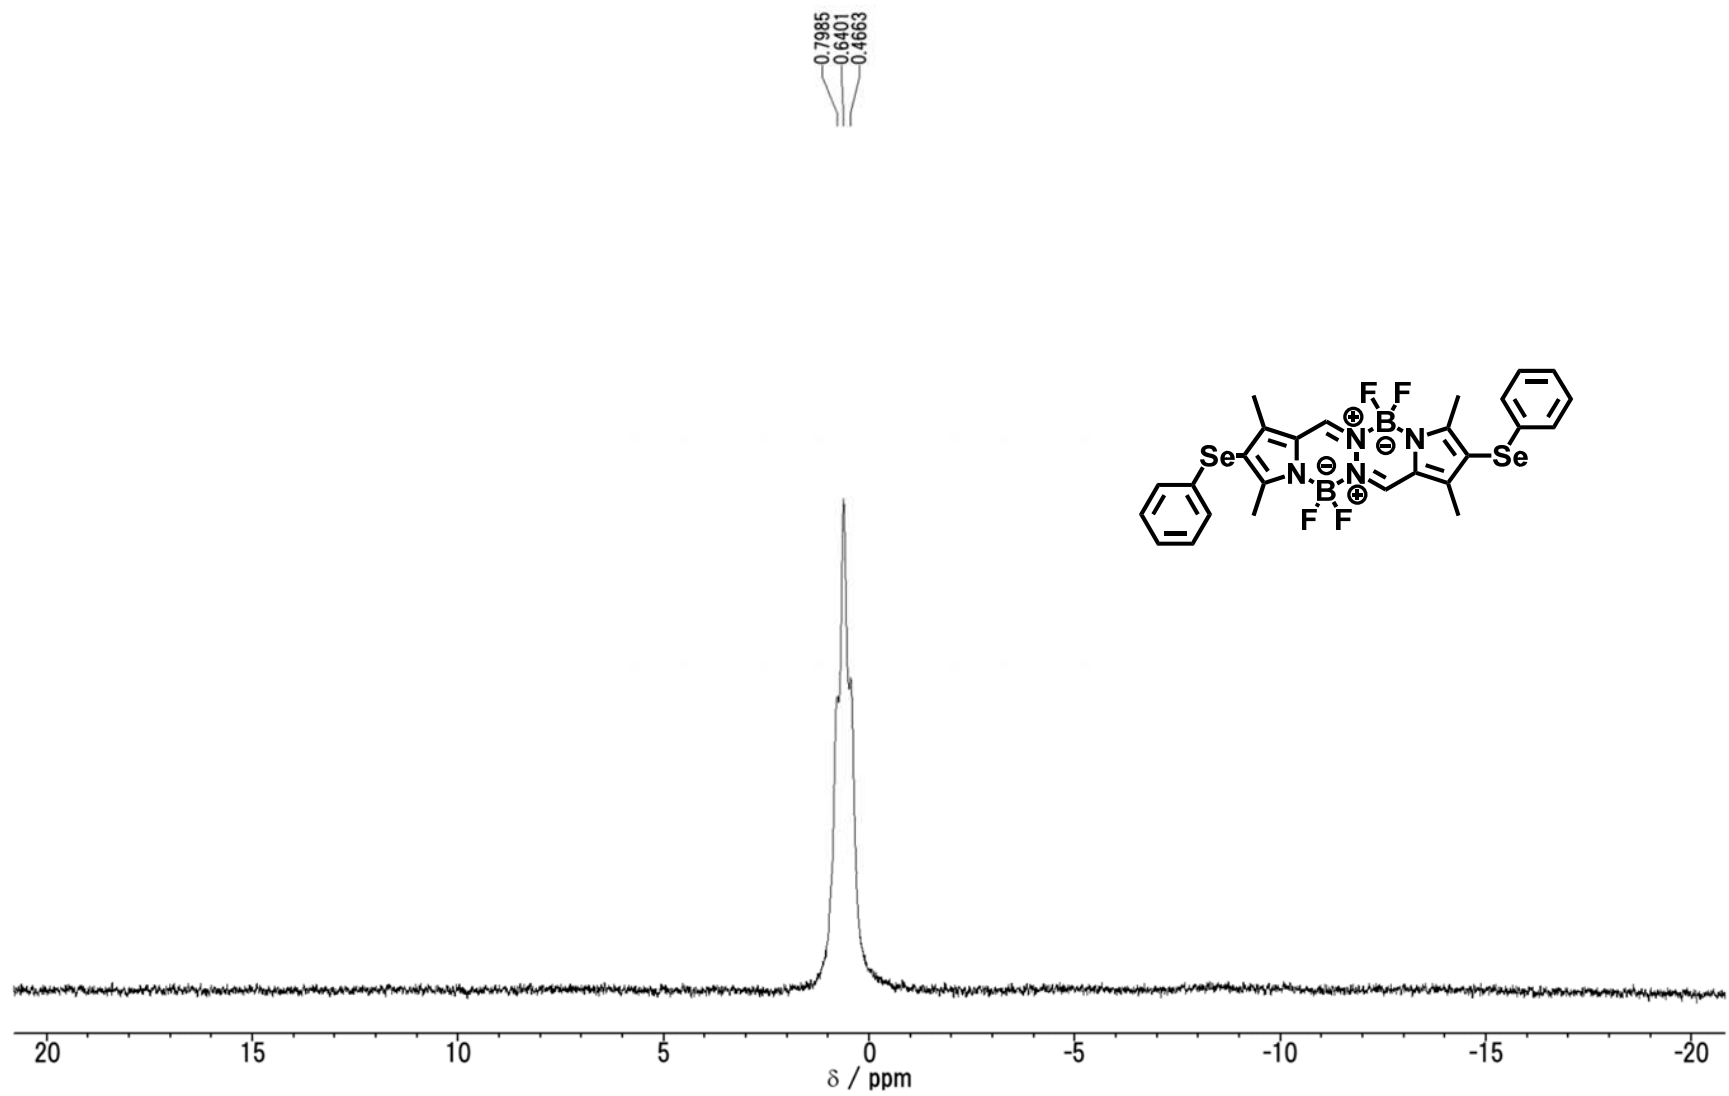

**Fig. S15.**  $^{11}\text{B}$  NMR spectrum of **1** (160 MHz) in  $\text{CDCl}_3$ .

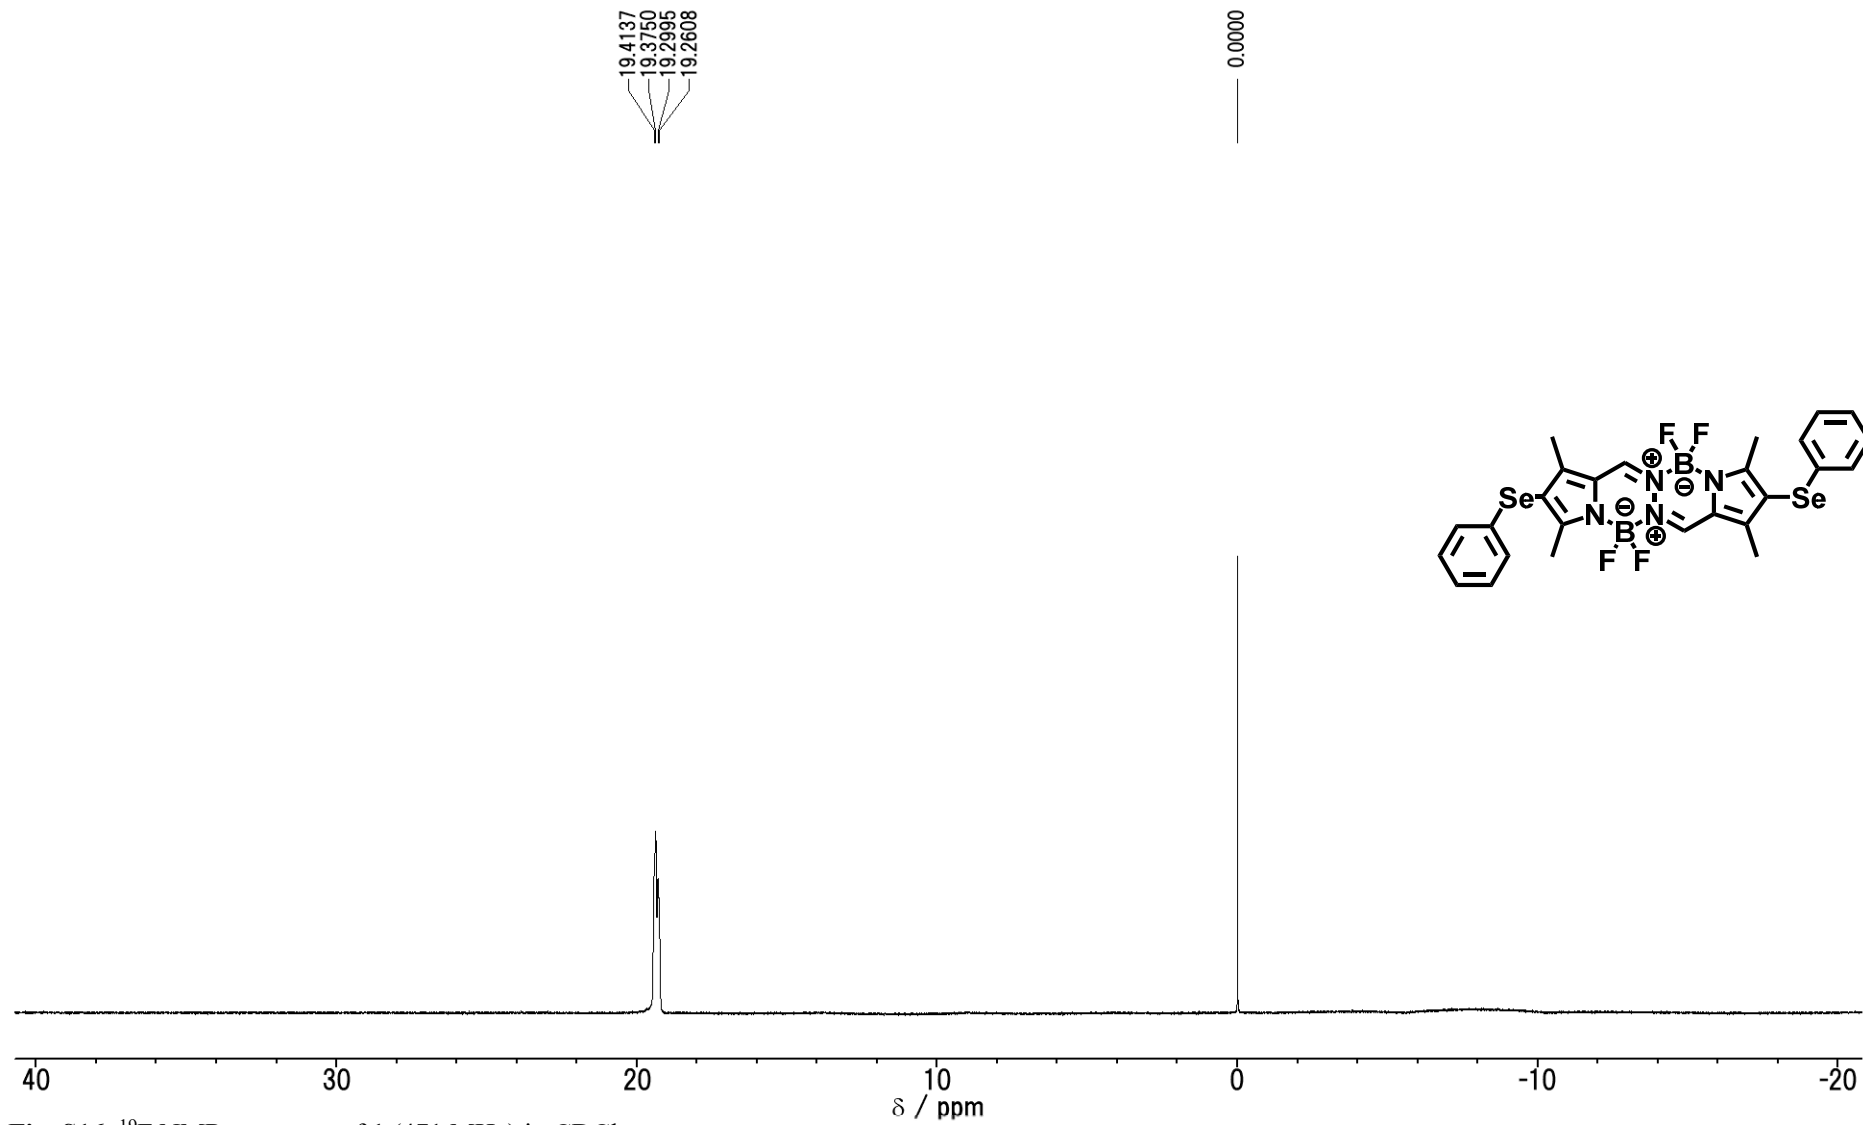

**Fig. S16.**  $^{19}\text{F}$  NMR spectrum of **1** (471 MHz) in  $\text{CDCl}_3$ .

# Generic Display Report

## Analysis Info

Analysis Name D:\Data\syn1\kubo20201219\#19\_SeBPH\_1.d  
Method APCI\_pos\_DIP.m  
Sample Name #19\_SeBPH\_1  
Comment Cap 150  
Hex 400

Acquisition Date 12/20/2020 5:16:30 AM

Operator BDAL@DE  
Instrument micrOTOF

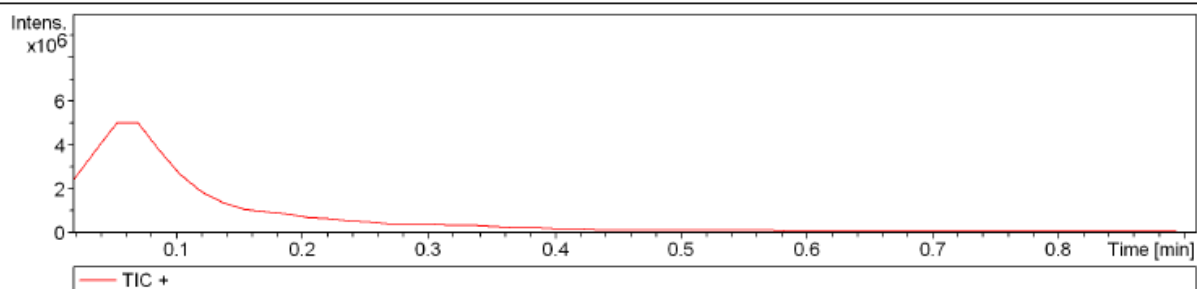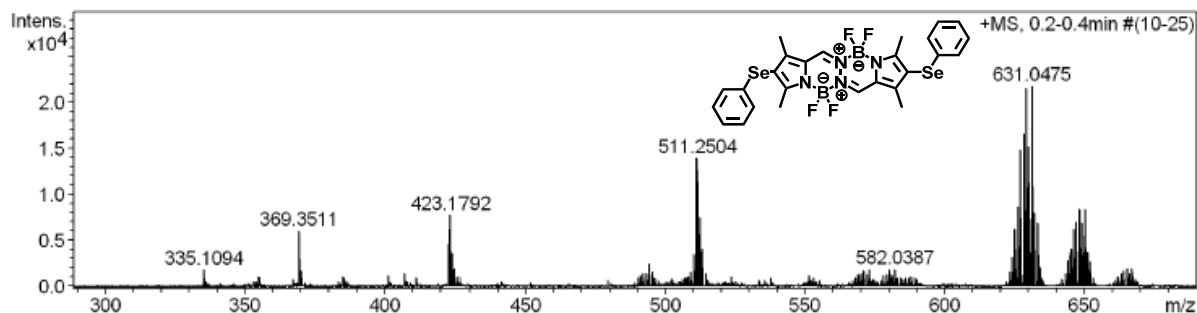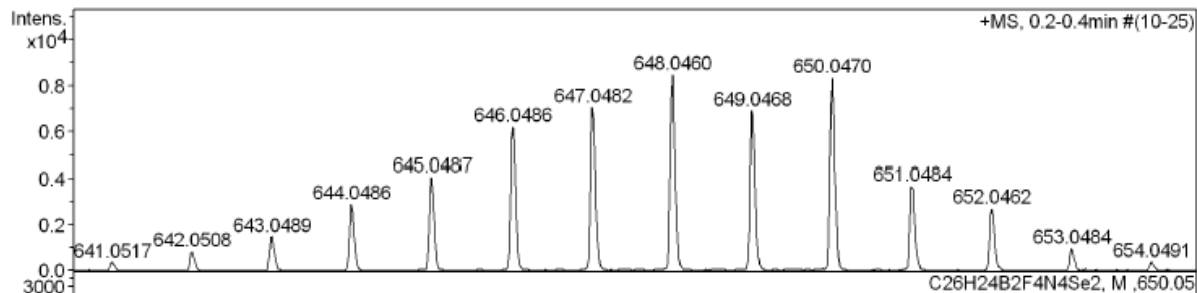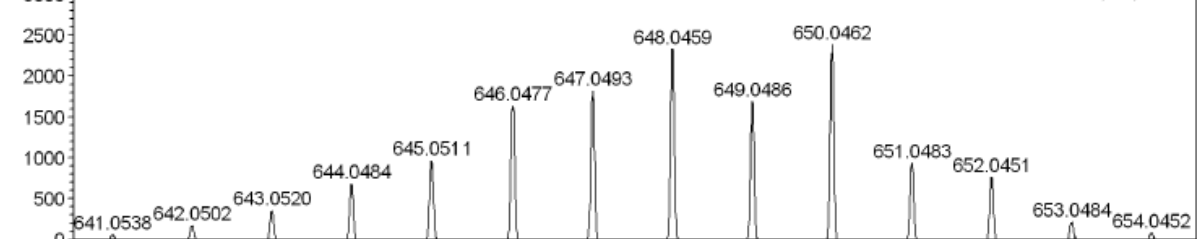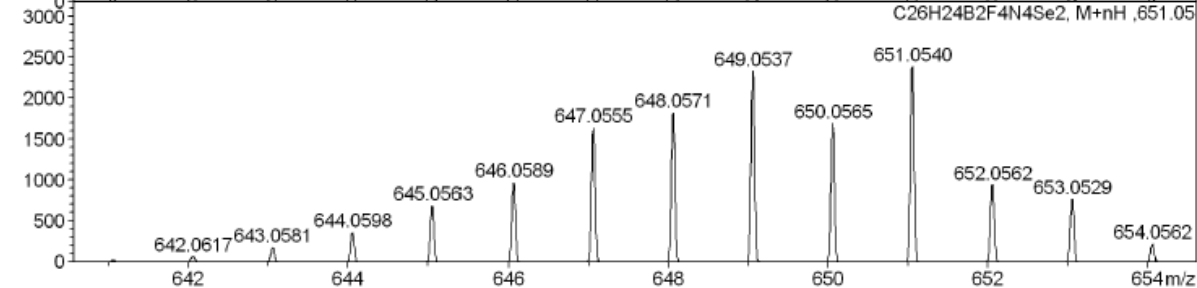

Fig. S17. APCI mass spectrum of 1.

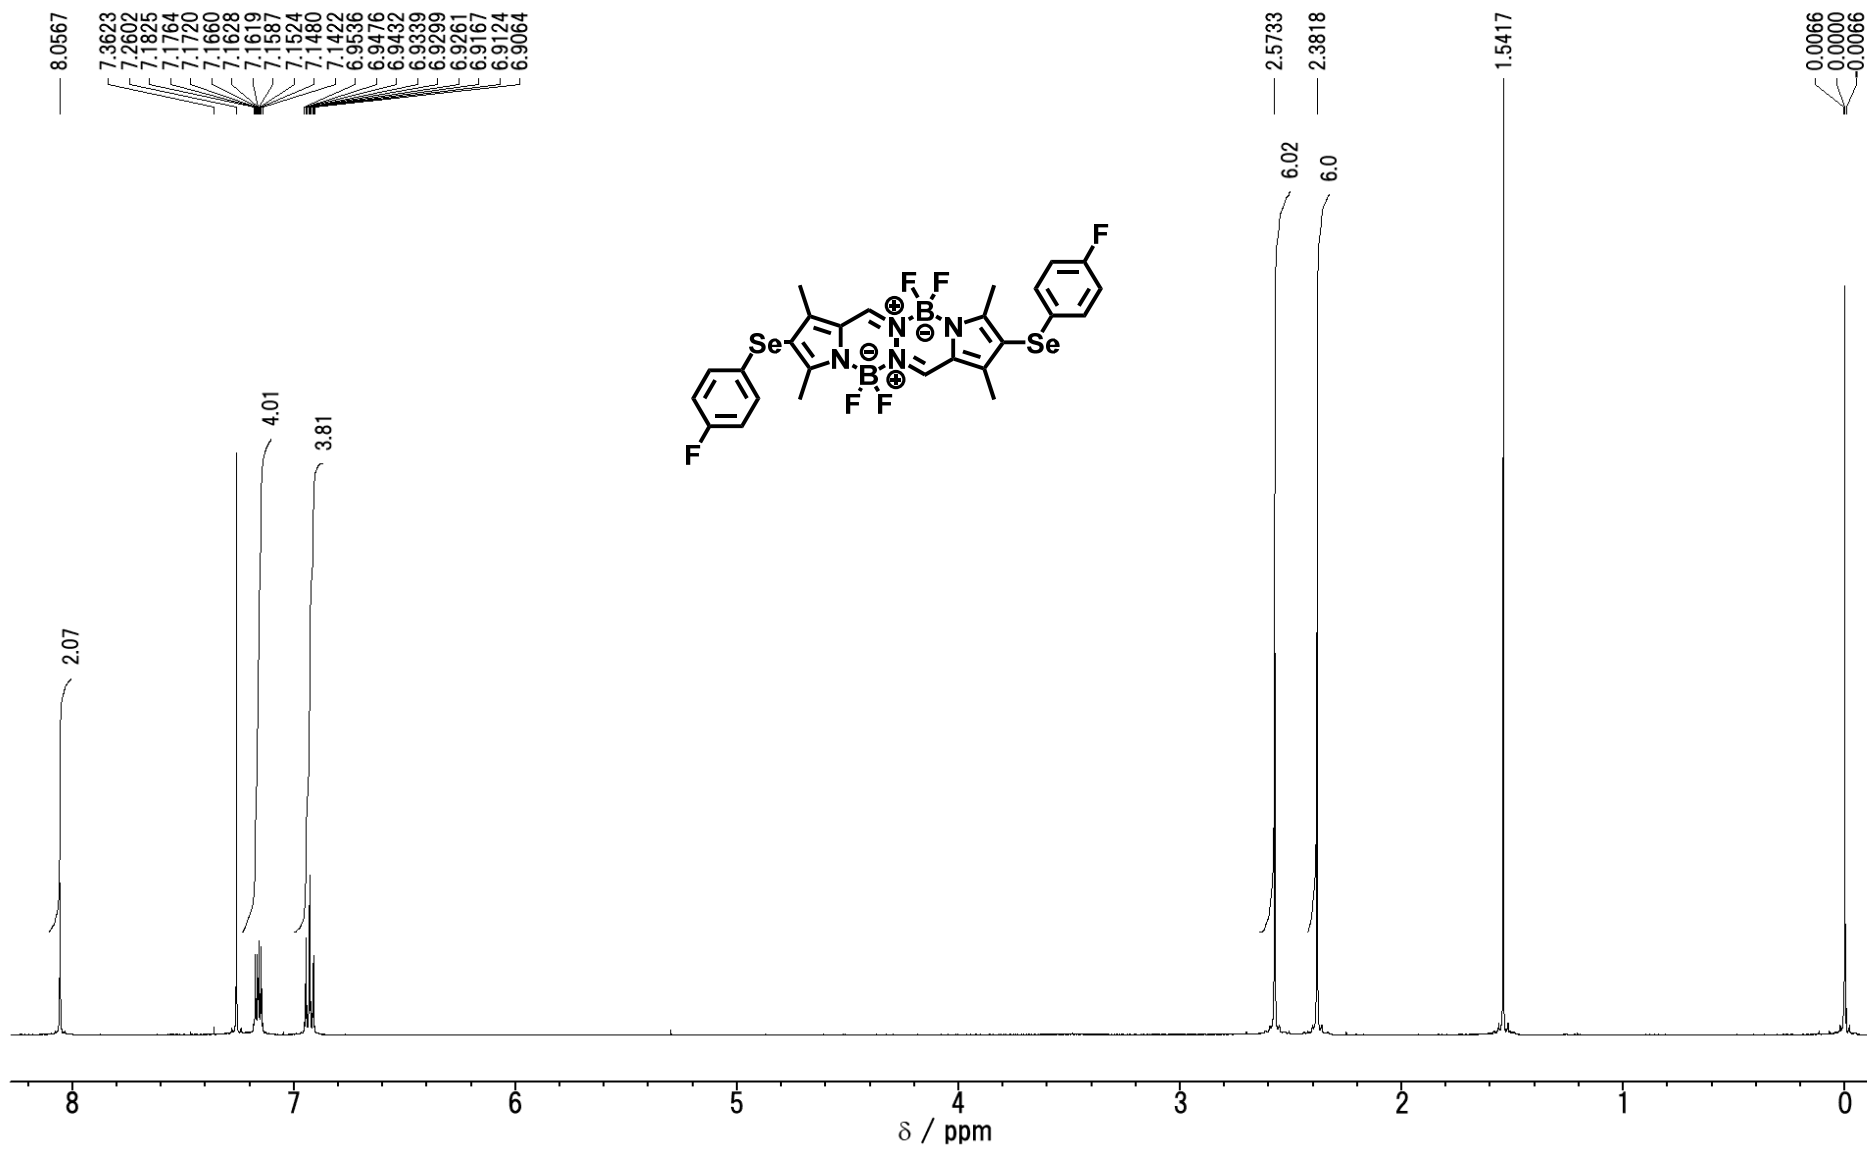

Fig. S18. <sup>1</sup>H NMR spectrum of 2 (500 MHz) in CDCl<sub>3</sub>.



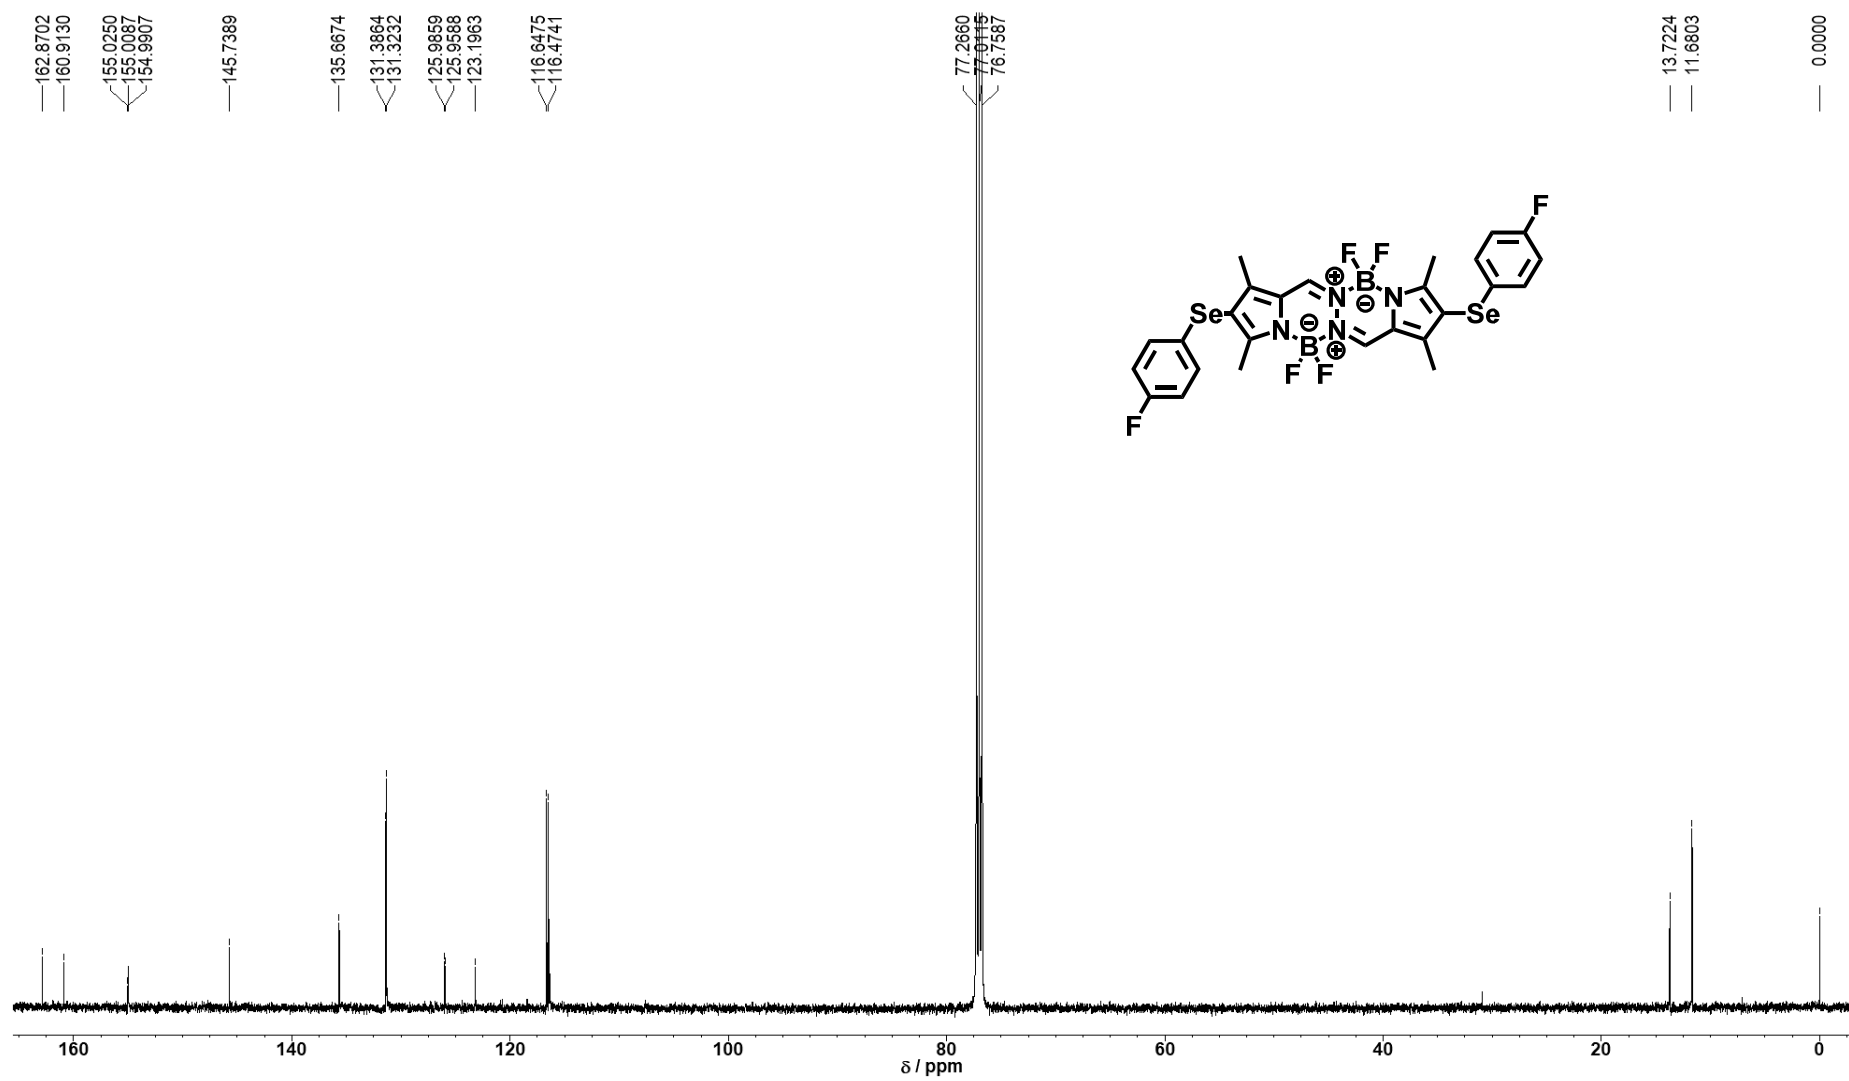

Fig. S19.  $^{13}\text{C}$  NMR spectrum of 2 (126 MHz) in  $\text{CDCl}_3$ .

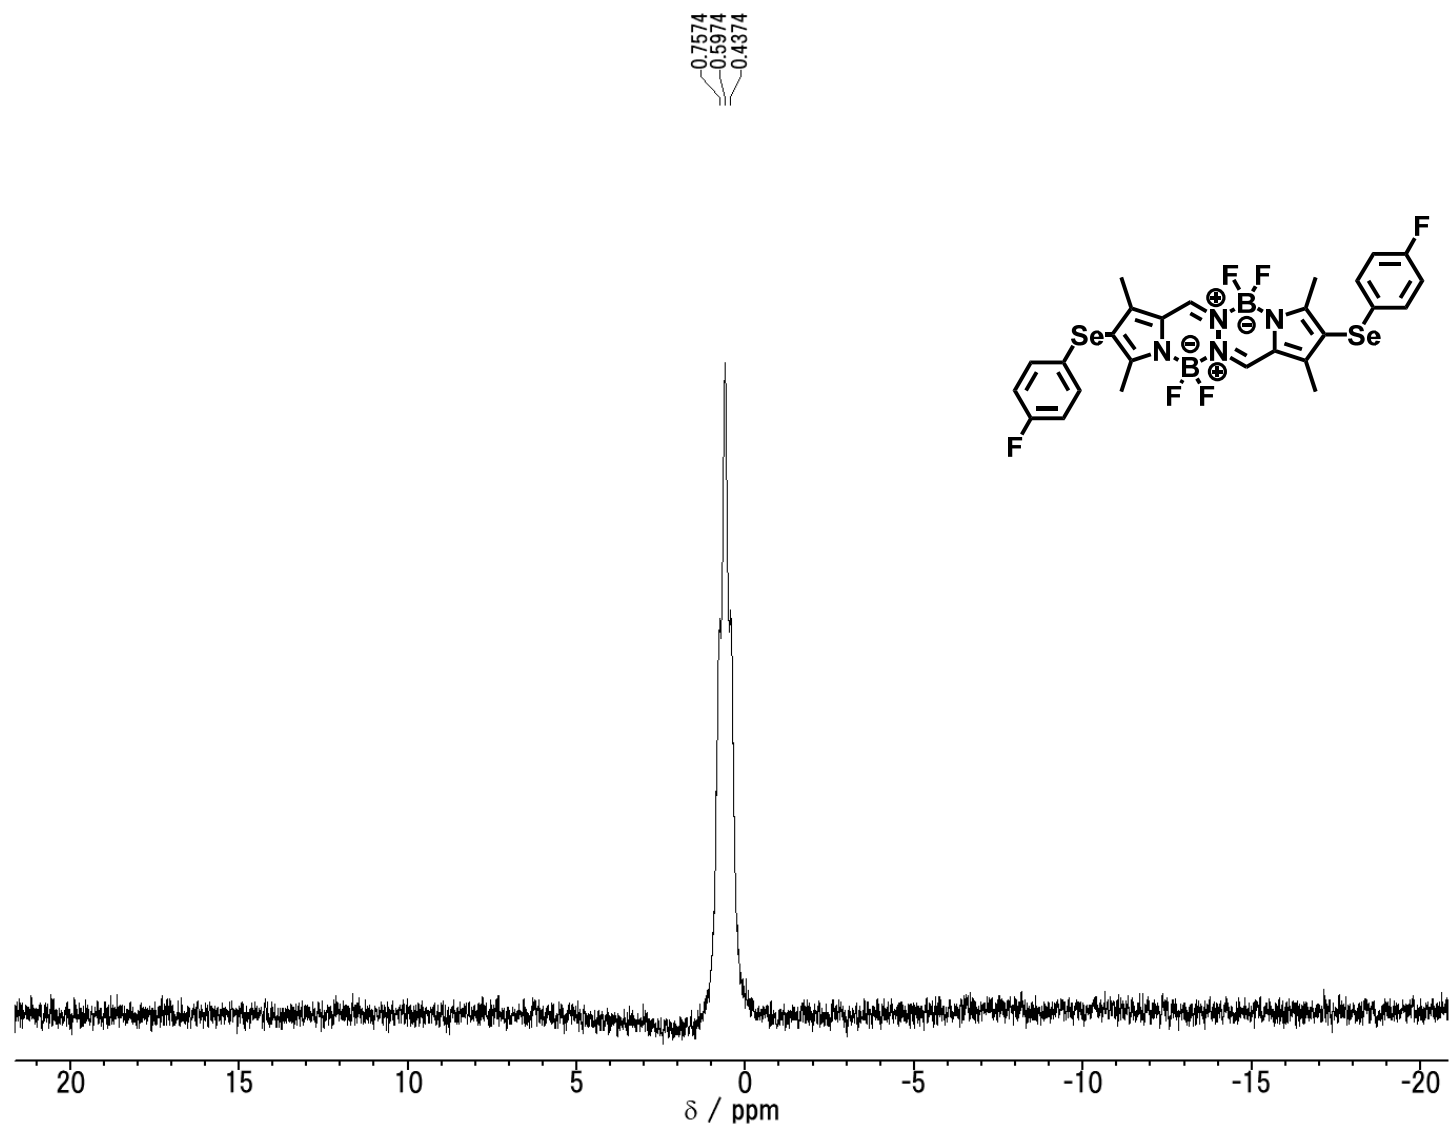

**Fig. S20.**  $^{11}\text{B}$  NMR spectrum of **2** (160 MHz) in  $\text{CDCl}_3$ .

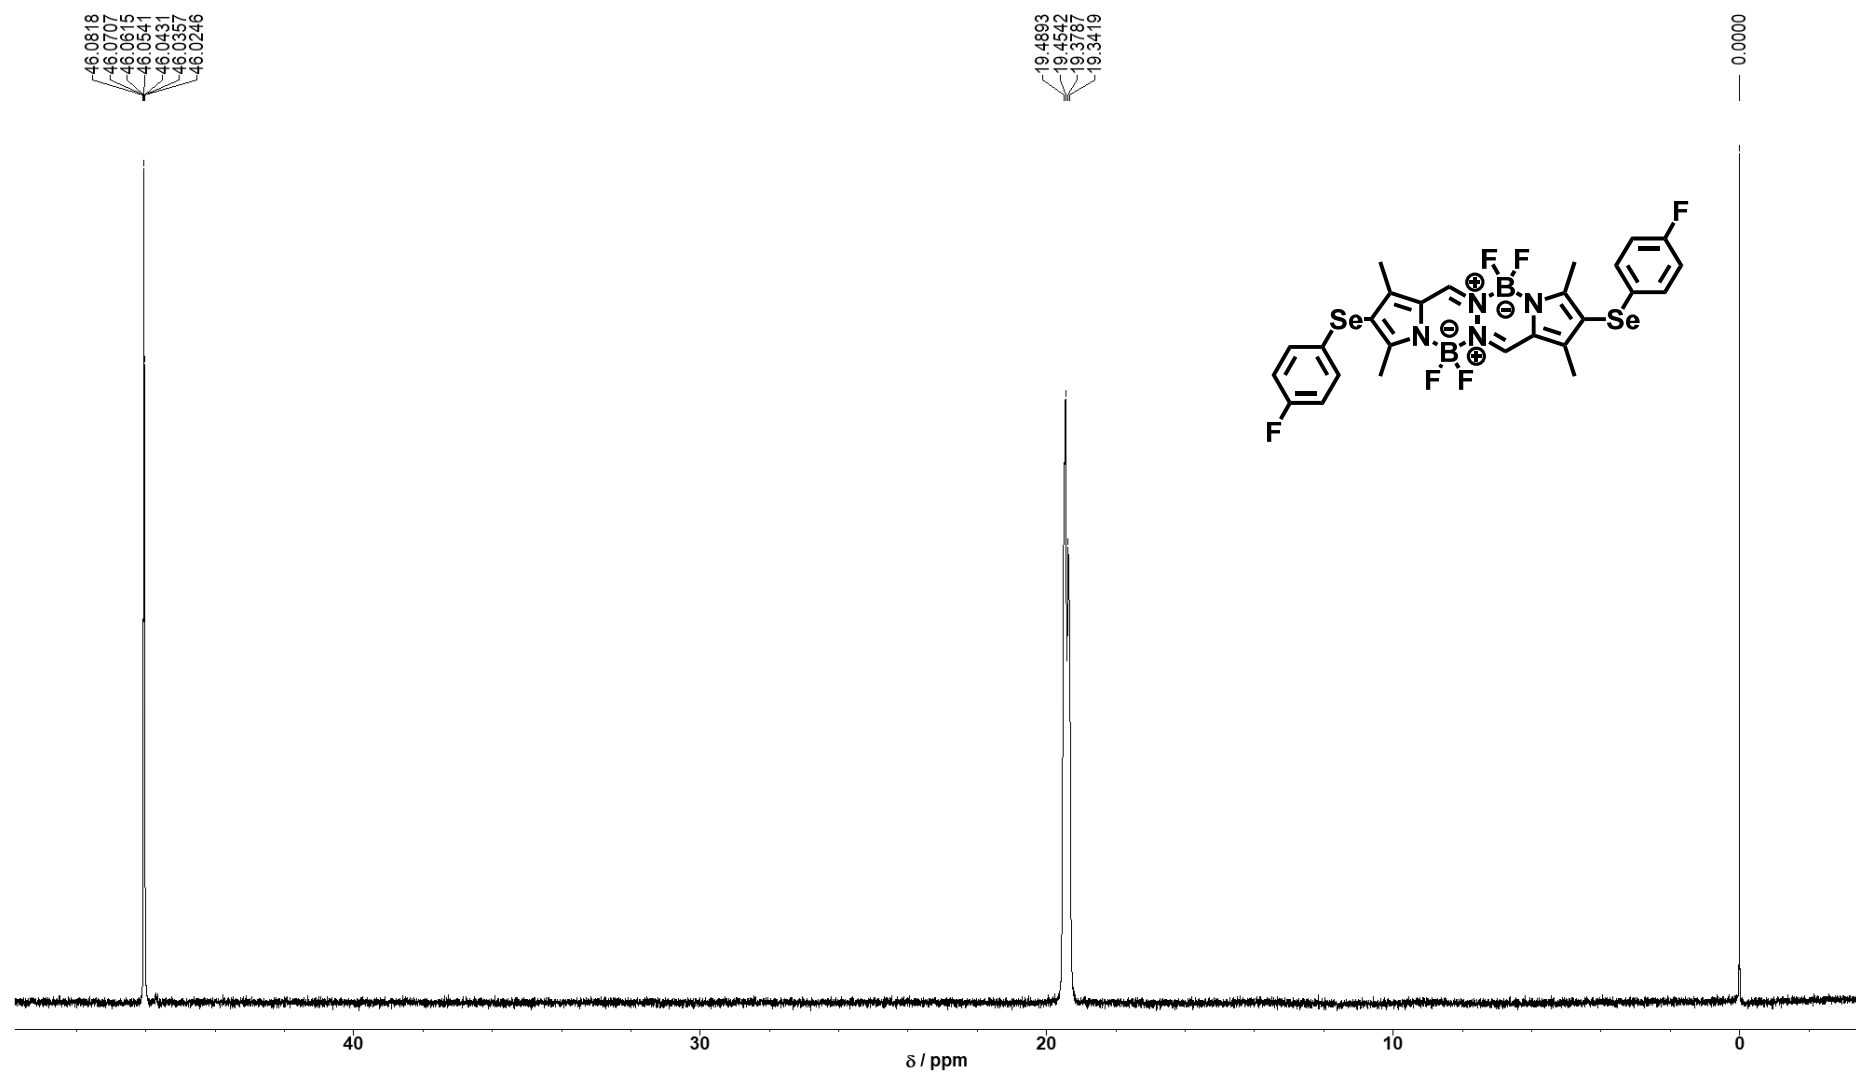

Fig. S21.  $^{19}\text{F}$  NMR spectrum of **2** (471 MHz) in  $\text{CDCl}_3$ .

# Generic Display Report

## Analysis Info

Analysis Name D:\Data\syn1\kubo20201219\#20\_FSeBPH\_1.d  
Method APCI\_pos\_DIP.m  
Sample Name #20\_FSeBPH\_1  
Comment Cap 150  
Hex 400

Acquisition Date 12/20/2020 5:27:25 AM

Operator BDAL@DE  
Instrument micrOTOF

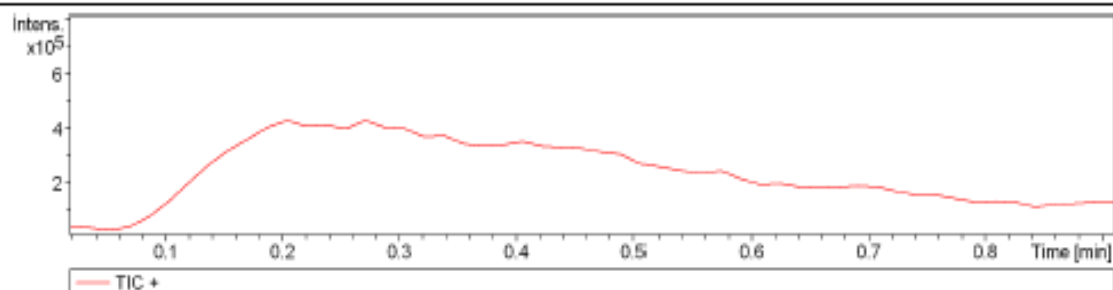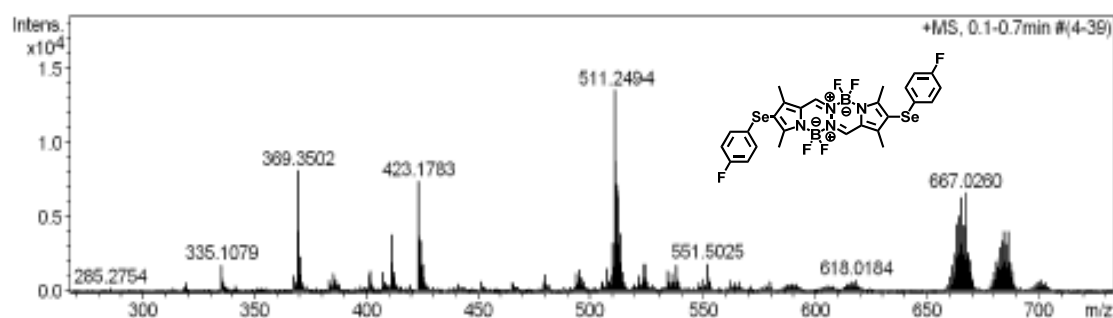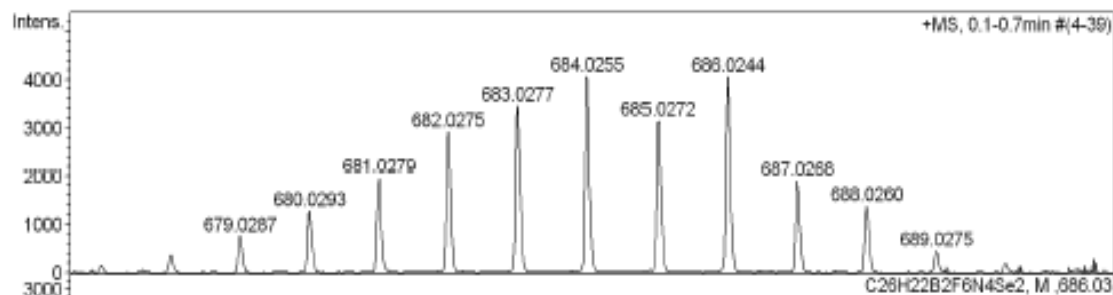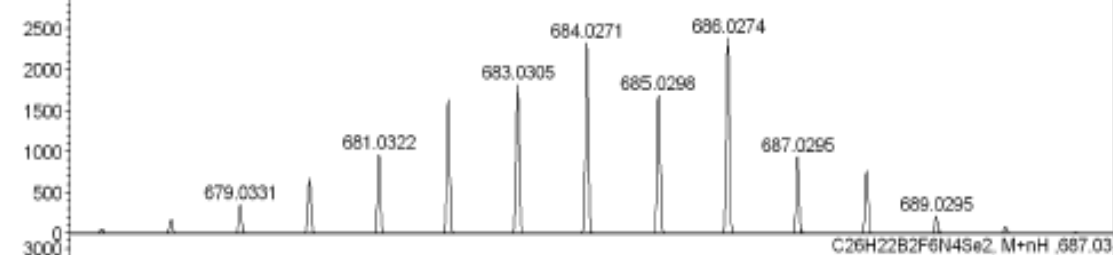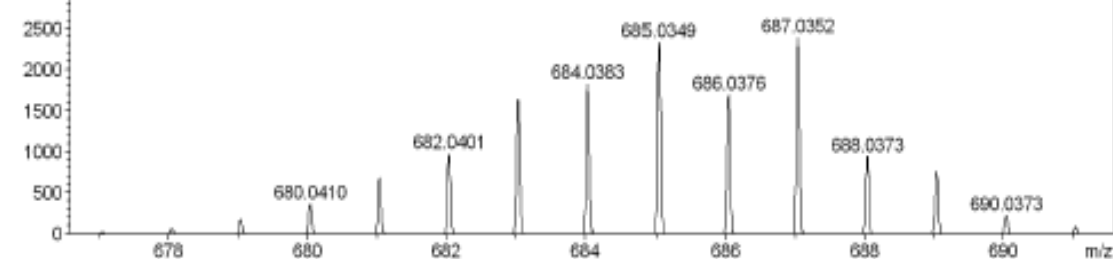

Fig. S22. APCIPCI mass spectrum of 2.

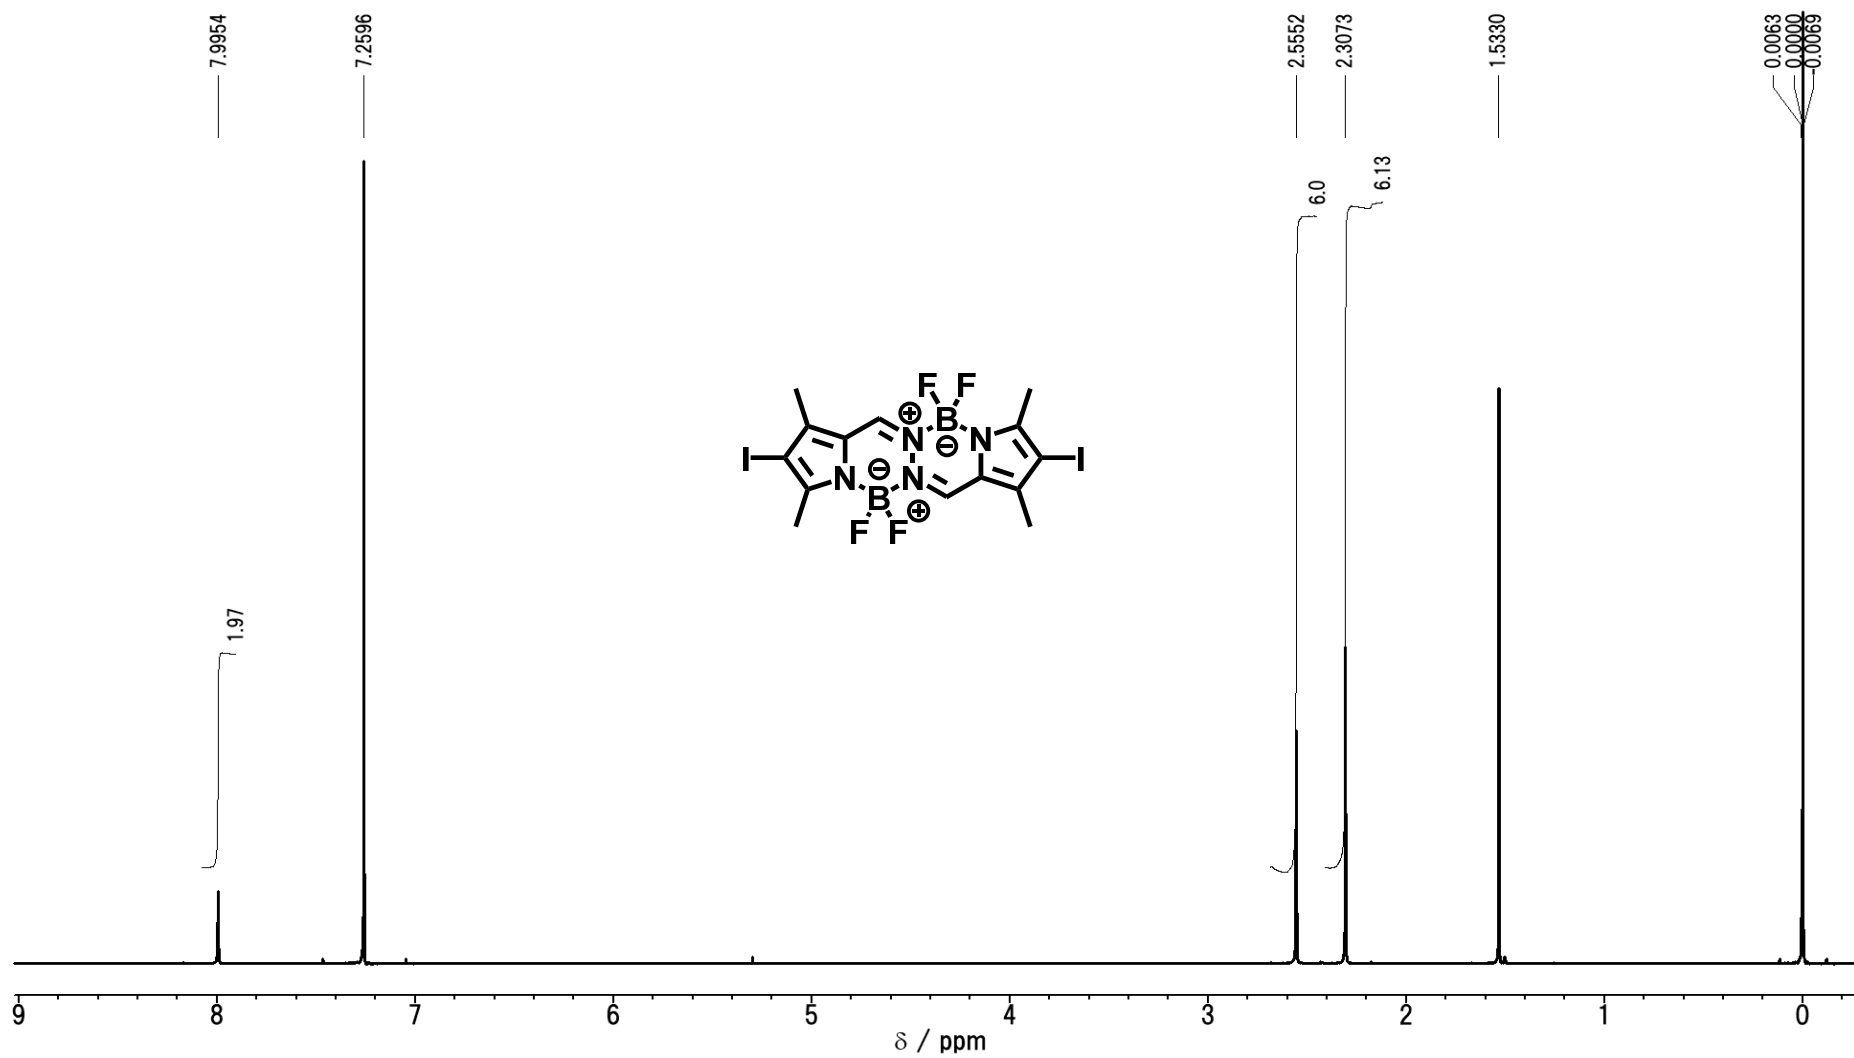

Fig. S23.  $^1H$  NMR spectrum of  $I_2BOPHY$  (500 MHz) in  $CDCl_3$ .

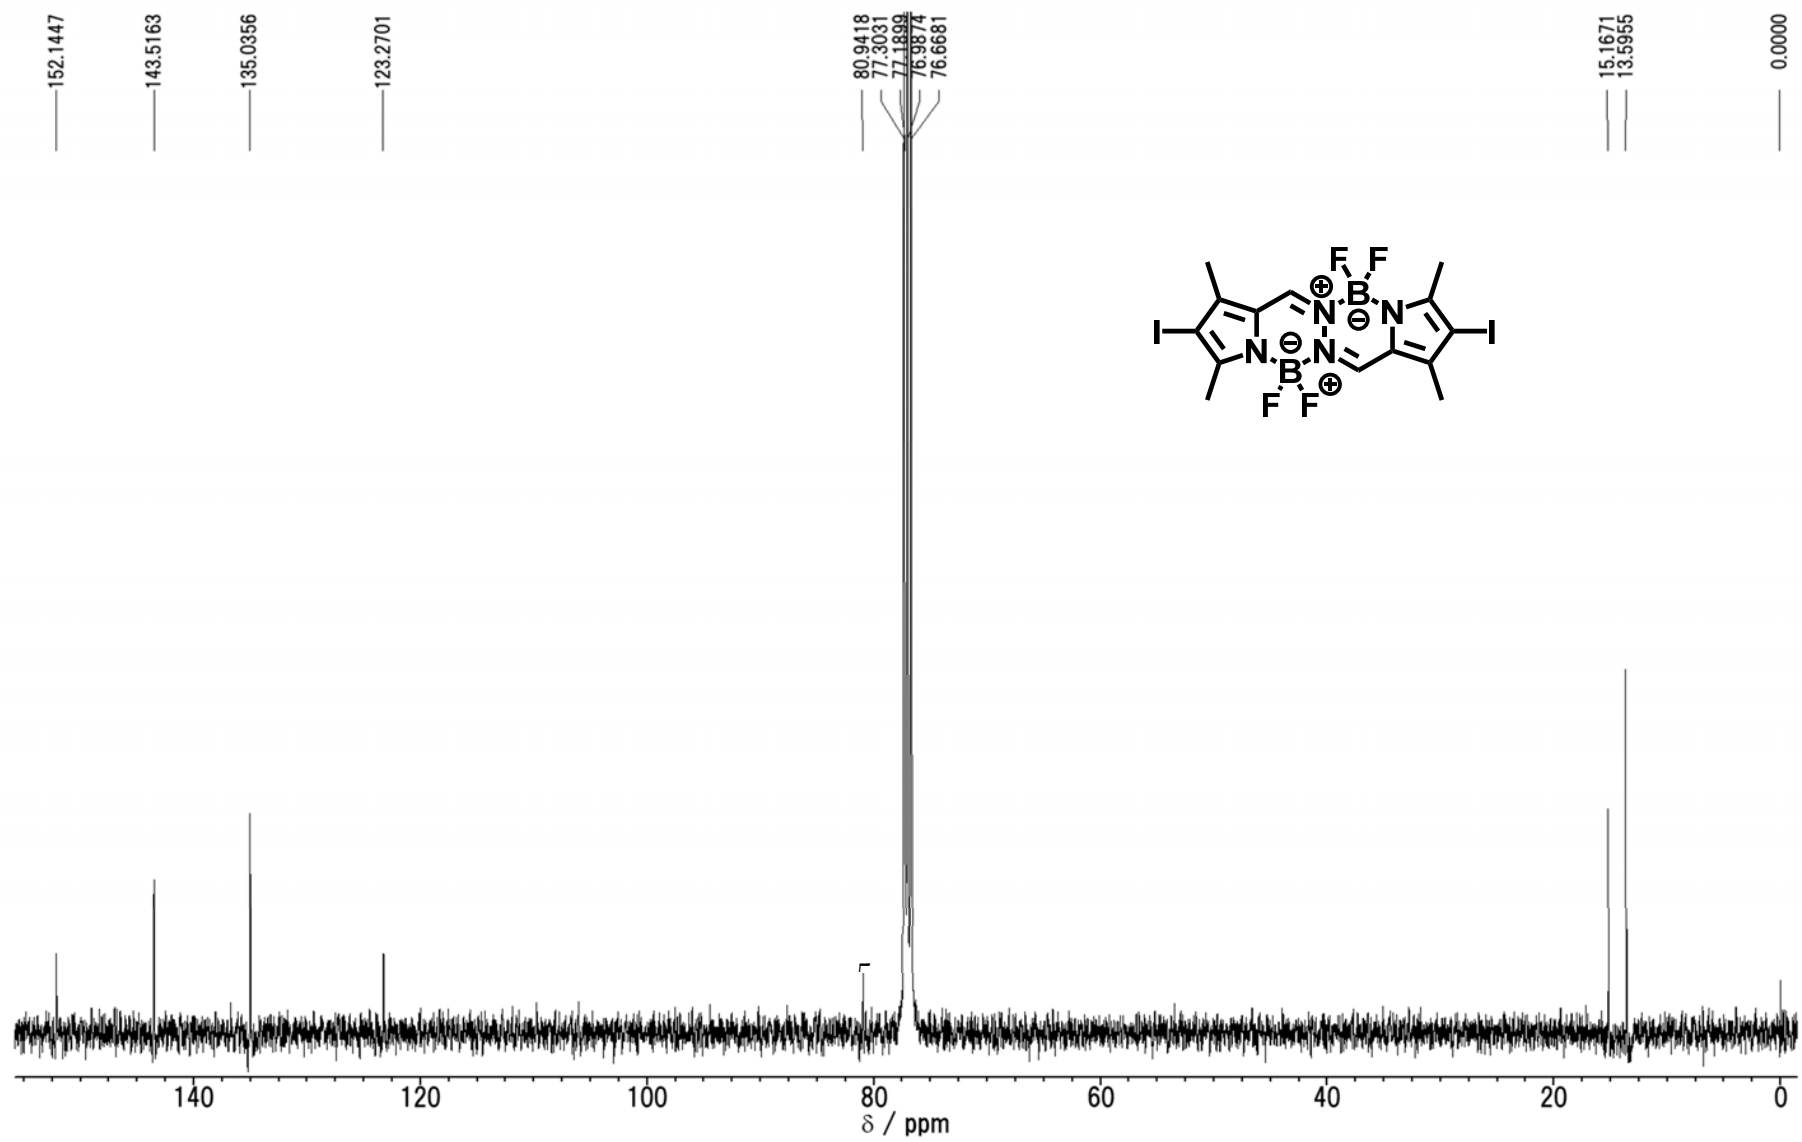

Fig. S24. <sup>13</sup>C NMR spectrum of I<sub>2</sub>BOPHY (126 MHz) in CDCl<sub>3</sub>.

[ Mass Spectrum ]

Data : 20200120\_iwakiri026 Date : 20-Jan-2020 10:52

Instrument : MStation

Sample : -

Inlet : Direct Ion Mode : FAB+

Spectrum Type : Normal Ion [MF-Linear]

Scan# : (3,12)

BP : m/z 136 Int. : 3.10 (32512)

Output m/z range : 50 to 633 Cut Level : 0.00 %

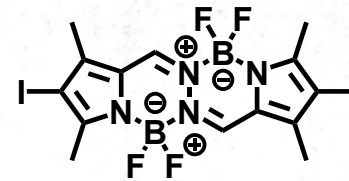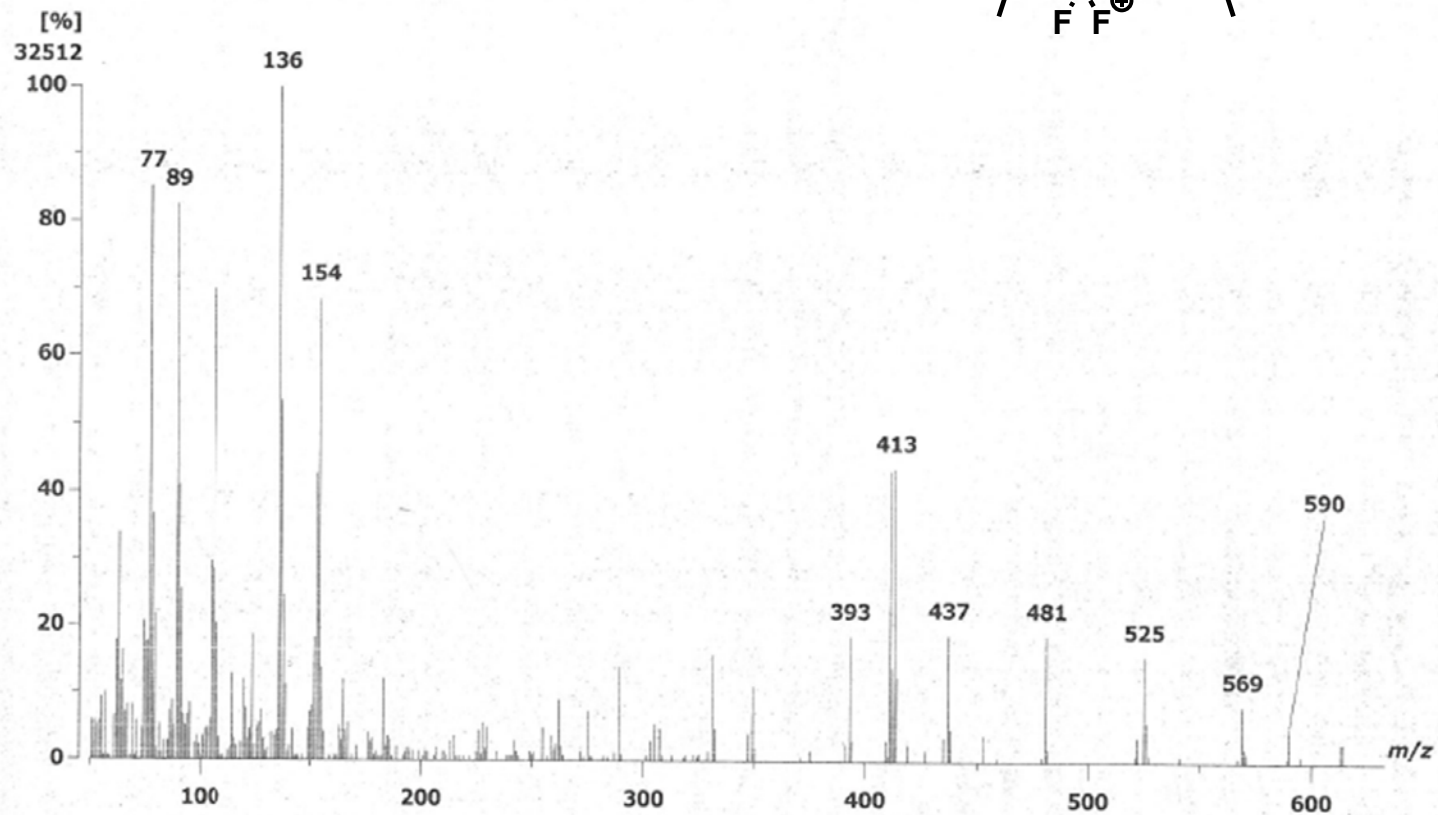

Fig. S25. FAB mass spectrum (positive mode) of I<sub>2</sub>BOPHY.

### Single Crystal Structure Report for **1** (CCDC No. 2057404)

A specimen of  $C_{26}H_{24}B_2F_4N_4Se_2$  was used for the X-ray crystallographic analysis. The X-ray intensity data were measured ( $\lambda = 1.54178 \text{ \AA}$ ).

The total exposure time was 0.66 hours. The frames were integrated with the Bruker SAINT software package using a narrow-frame algorithm. The integration of the data using a monoclinic unit cell yielded a total of 9290 reflections to a maximum  $\theta$  angle of  $66.54^\circ$  ( $0.84 \text{ \AA}$  resolution), of which 2160 were independent (average redundancy 4.301, completeness = 96.0%,  $R_{int} = 3.42\%$ ,  $R_{sig} = 2.77\%$ ) and 2143 (99.21%) were greater than  $2\sigma(F_2)$ . The final cell constants of  $a = 25.0876(11) \text{ \AA}$ ,  $b = 5.2205(2) \text{ \AA}$ ,  $c = 22.5474(9) \text{ \AA}$ ,  $\beta = 120.3860(10)^\circ$ , volume =  $2547.39(18) \text{ \AA}^3$ , are based upon the refinement of the XYZ-centroids of 8291 reflections above  $20 \sigma(I)$  with  $7.059^\circ < 2\theta < 133.0^\circ$ . Data were corrected for absorption effects using the Multi-Scan method (SADABS). The ratio of minimum to maximum apparent transmission was 0.655.

The structure was solved and refined using the Bruker SHELXTL Software Package, using the space group  $C 1 2/c 1$ , with  $Z = 4$  for the formula unit,  $C_{26}H_{24}B_2F_4N_4Se_2$ . The final anisotropic full-matrix least-squares refinement on  $F_2$  with 174 variables converged at  $R_1 = 2.54\%$ , for the observed data and  $wR_2 = 6.04\%$  for all data. The goodness-of-fit was 1.171. The largest peak in the final difference electron density synthesis was  $0.304 \text{ e}^-/\text{\AA}^3$  and the largest hole was  $-0.320 \text{ e}^-/\text{\AA}^3$  with an RMS deviation of  $0.058 \text{ e}^-/\text{\AA}^3$ . On the basis of the final model, the calculated density was  $1.690 \text{ g/cm}^3$  and  $F(000)$ , 1288  $e^-$ .

### Atom numbering of **1**

Front view

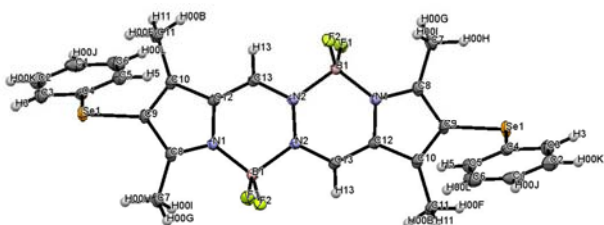

(a)

Top view

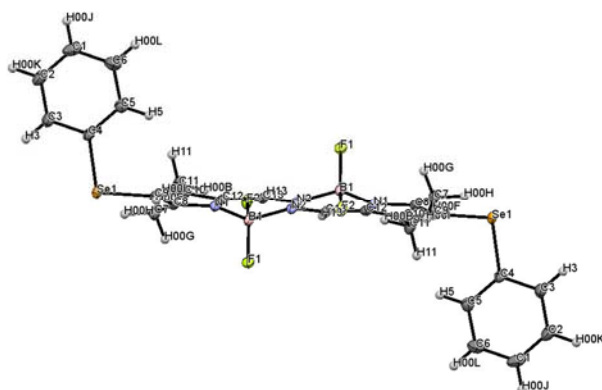

(b)

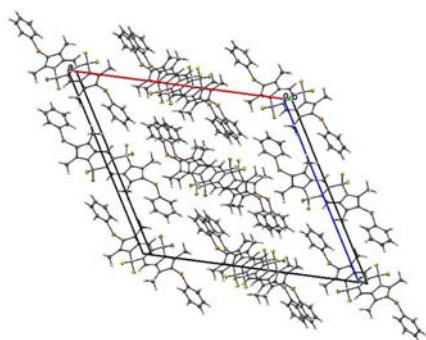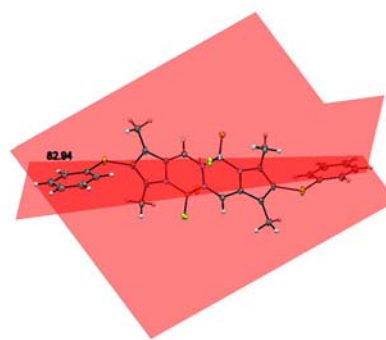

**Fig. S26**(a) Packing structure, dihedral of BOPHY (b) Dihedral between BOPHY core and phenyl group.



**Table S9.** Sample and crystal data for **1**.

|                        |                              |                              |
|------------------------|------------------------------|------------------------------|
| Identification code    | SeBOPHY                      |                              |
| Chemical formula       | $C_{26}H_{24}B_2F_4N_4Se_2$  |                              |
| Formula weight         | 648.03 g/mol                 |                              |
| Temperature            | 120(2) K                     |                              |
| Wavelength             | 1.54178 Å                    |                              |
| Crystal system         | monoclinic                   |                              |
| Space group            | C 1 2/c 1                    |                              |
| Unit cell dimensions   | $a = 25.0876(11)$ Å          | $\alpha = 90^\circ$          |
|                        | $b = 5.2205(2)$ Å            | $\beta = 120.3860(10)^\circ$ |
|                        | $c = 22.5474(9)$ Å           | $\gamma = 90^\circ$          |
| Volume                 | $2547.39(18)$ Å <sup>3</sup> |                              |
| Z                      | 4                            |                              |
| Density (calculated)   | 1.690 g/cm <sup>3</sup>      |                              |
| Absorption coefficient | 4.101 mm <sup>-1</sup>       |                              |
| F(000)                 | 1288                         |                              |

**Table S10.** Data collection and structure refinement for **1**.

---

|                                     |                                                               |                           |
|-------------------------------------|---------------------------------------------------------------|---------------------------|
| Theta range for data collection     | 4.08 to 66.54°                                                |                           |
| Index ranges                        | -29<=h<=29, -6<=k<=4, -26<=l<=26                              |                           |
| Reflections collected               | 9290                                                          |                           |
| Independent reflections             | 2160 [R(int) = 0.0342]                                        |                           |
| Coverage of independent reflections | 96.00%                                                        |                           |
| Absorption correction               | Multi-Scan                                                    |                           |
| Structure solution technique        | direct methods                                                |                           |
| Structure solution program          | SHELXT 2014/5 (Sheldrick, 2014)                               |                           |
| Refinement method                   | Full-matrix least-squares on F <sup>2</sup>                   |                           |
| Refinement program                  | SHELXL-2018/3 (Sheldrick, 2018)                               |                           |
| Function minimized                  | $\Sigma w(F_o^2 - F_c^2)^2$                                   |                           |
| Data / restraints / parameters      | 2160 / 0 / 174                                                |                           |
| Goodness-of-fit on F <sup>2</sup>   | 1.171                                                         |                           |
| $\Delta/\sigma_{\max}$              | 0.002                                                         |                           |
| Final R indices                     | 2143 data; I>2 $\sigma$ (I)                                   | R1 = 0.0254, wR2 = 0.0603 |
|                                     | all data                                                      | R1 = 0.0255, wR2 = 0.0604 |
| Weighting scheme                    | $w=1/[\sigma^2(F_o^2)+5.9672P]$<br>where $P=(F_o^2+2F_c^2)/3$ |                           |
| Largest diff. peak and hole         | 0.304 and -0.320 eÅ <sup>-3</sup>                             |                           |
| R.M.S. deviation from mean          | 0.058 eÅ <sup>-3</sup>                                        |                           |

---

**Table S11.** Atomic coordinates and equivalent isotropic atomic displacement parameters ( $\text{\AA}^2$ ) for **1**.

|     | x/a         | y/b        | z/c         | U(eq)       |
|-----|-------------|------------|-------------|-------------|
| Se1 | 0.34540(2)  | 0.74246(4) | 0.58820(2)  | 0.01890(11) |
| B1  | 0.40524(10) | 0.0629(4)  | 0.44528(11) | 0.0146(4)   |
| F1  | 0.39062(5)  | 0.2018(2)  | 0.38667(6)  | 0.0206(3)   |
| N1  | 0.40942(8)  | 0.2356(3)  | 0.50176(9)  | 0.0145(4)   |
| C1  | 0.33952(11) | 0.2730(5)  | 0.76270(12) | 0.0268(5)   |
| N2  | 0.52701(7)  | 0.0565(3)  | 0.52628(8)  | 0.0139(3)   |
| F2  | 0.36495(5)  | 0.8619(2)  | 0.42973(6)  | 0.0202(3)   |
| C2  | 0.30393(10) | 0.4892(5)  | 0.73483(11) | 0.0265(5)   |
| C3  | 0.30583(10) | 0.6233(4)  | 0.68300(11) | 0.0223(5)   |
| C4  | 0.34475(9)  | 0.5423(4)  | 0.65935(10) | 0.0161(4)   |
| C5  | 0.38120(9)  | 0.3257(4)  | 0.68767(11) | 0.0192(4)   |
| C6  | 0.37813(10) | 0.1912(5)  | 0.73875(11) | 0.0250(5)   |
| C10 | 0.45409(9)  | 0.5151(4)  | 0.59194(10) | 0.0154(4)   |
| C11 | 0.50080(10) | 0.6657(4)  | 0.65260(11) | 0.0211(4)   |
| C12 | 0.46563(9)  | 0.3337(4)  | 0.55358(10) | 0.0142(4)   |
| C13 | 0.52105(9)  | 0.2416(4)  | 0.56227(10) | 0.0148(4)   |
| C8  | 0.36337(9)  | 0.3525(4)  | 0.50584(10) | 0.0157(4)   |
| C7  | 0.29711(10) | 0.3022(5)  | 0.45556(11) | 0.0214(4)   |
| C9  | 0.39000(9)  | 0.5233(4)  | 0.56207(10) | 0.0160(4)   |

**Table S12.** Bond length ( $\text{\AA}$ ) for **1**.

| atom | atom | distance   | atom | atom | distance |
|------|------|------------|------|------|----------|
| Se1  | C9   | 1.8906(19) | Se1  | C4   | 1.922(2) |
| B1   | F2   | 1.374(3)   | B1   | F1   | 1.384(3) |
| B1   | N1   | 1.520(3)   | B1   | N2#1 | 1.608(3) |
| N1   | C8   | 1.350(3)   | N1   | C12  | 1.396(3) |
| C1   | C2   | 1.378(4)   | C1   | C6   | 1.393(4) |
| C1   | H00J | 0.95       | N2   | C13  | 1.318(3) |
| N2   | N2#1 | 1.401(3)   | C2   | C3   | 1.384(3) |
| C2   | H00K | 0.95       | C3   | C4   | 1.394(3) |
| C3   | H3   | 0.95       | C4   | C5   | 1.390(3) |
| C5   | C6   | 1.384(3)   | C5   | H5   | 0.95     |
| C6   | H00L | 0.95       | C10  | C9   | 1.395(3) |
| C10  | C12  | 1.408(3)   | C10  | C11  | 1.497(3) |
| C11  | H00B | 0.98       | C11  | H11  | 0.98     |
| C11  | H00F | 0.98       | C12  | C13  | 1.388(3) |
| C13  | H13  | 0.95       | C8   | C9   | 1.411(3) |
| C8   | C7   | 1.487(3)   | C7   | H00G | 0.98     |
| C7   | H00H | 0.98       | C7   | H00I | 0.98     |

**Table S13.** Bond angles (°) for **1**.

|               |            |              |            |
|---------------|------------|--------------|------------|
| C9-Se1-C4     | 100.80(8)  | F2-B1-F1     | 110.55(16) |
| F2-B1-N1      | 113.39(16) | F1-B1-N1     | 111.23(17) |
| F2-B1-N2#1    | 107.36(16) | F1-B1-N2#1   | 107.45(15) |
| N1-B1-N2#1    | 106.54(15) | C8-N1-C12    | 108.29(17) |
| C8-N1-B1      | 128.78(17) | C12-N1-B1    | 122.09(16) |
| C2-C1-C6      | 119.4(2)   | C2-C1-H00J   | 120.3      |
| C6-C1-H00J    | 120.3      | C13-N2-N2#1  | 117.83(19) |
| C13-N2-B1#1   | 117.69(16) | N2#1-N2-B1#1 | 123.31(19) |
| C1-C2-C3      | 120.6(2)   | C1-C2-H00K   | 119.7      |
| C3-C2-H00K    | 119.7      | C2-C3-C4     | 120.0(2)   |
| C2-C3-H3      | 120        | C4-C3-H3     | 120        |
| C5-C4-C3      | 119.76(19) | C5-C4-Se1    | 122.98(15) |
| C3-C4-Se1     | 117.26(16) | C6-C5-C4     | 119.6(2)   |
| C6-C5-H5      | 120.2      | C4-C5-H5     | 120.2      |
| C5-C6-C1      | 120.6(2)   | C5-C6-H00L   | 119.7      |
| C1-C6-H00L    | 119.7      | C9-C10-C12   | 105.61(17) |
| C9-C10-C11    | 127.12(18) | C12-C10-C11  | 127.26(18) |
| C10-C11-H00B  | 109.5      | C10-C11-H11  | 109.5      |
| H00B-C11-H11  | 109.5      | C10-C11-H00F | 109.5      |
| H00B-C11-H00F | 109.5      | H11-C11-H00F | 109.5      |
| C13-C12-N1    | 120.43(18) | C13-C12-C10  | 130.45(19) |
| N1-C12-C10    | 109.05(17) | N2-C13-C12   | 125.76(19) |
| N2-C13-H13    | 117.1      | C12-C13-H13  | 117.1      |
| N1-C8-C9      | 108.32(17) | N1-C8-C7     | 122.22(18) |
| C9-C8-C7      | 129.43(18) | C8-C7-H00G   | 109.5      |
| C8-C7-H00H    | 109.5      | H00G-C7-H00H | 109.5      |
| C8-C7-H00I    | 109.5      | H00G-C7-H00I | 109.5      |
| H00H-C7-H00I  | 109.5      | C10-C9-C8    | 108.70(17) |
| C10-C9-Se1    | 125.98(15) | C8-C9-Se1    | 125.20(15) |

**Table S14.** Anisotropic atomic displacement parameters ( $\text{\AA}^2$ ) for **1**.

|     | $U_{11}$    | $U_{22}$    | $U_{33}$    | $U_{23}$    | $U_{13}$    | $U_{12}$    |
|-----|-------------|-------------|-------------|-------------|-------------|-------------|
| Se1 | 0.02498(15) | 0.01882(15) | 0.01945(14) | 0.00429(8)  | 0.01606(11) | 0.00988(8)  |
| B1  | 0.0133(10)  | 0.0190(11)  | 0.0124(10)  | 0.0000(9)   | 0.0071(9)   | 0.0018(9)   |
| F1  | 0.0220(6)   | 0.0273(7)   | 0.0137(6)   | 0.0044(5)   | 0.0099(5)   | 0.0080(5)   |
| N1  | 0.0135(8)   | 0.0177(9)   | 0.0125(8)   | 0.0004(6)   | 0.0069(7)   | 0.0028(6)   |
| C1  | 0.0245(12)  | 0.0359(13)  | 0.0167(11)  | 0.0026(9)   | 0.0080(9)   | -0.0090(9)  |
| N2  | 0.0115(8)   | 0.0183(8)   | 0.0111(7)   | -0.0020(6)  | 0.0051(6)   | 0.0005(6)   |
| F2  | 0.0153(6)   | 0.0225(6)   | 0.0244(6)   | -0.0060(5)  | 0.0112(5)   | -0.0030(5)  |
| C2  | 0.0252(11)  | 0.0374(13)  | 0.0228(11)  | -0.0041(10) | 0.0165(9)   | -0.0039(10) |
| C3  | 0.0218(10)  | 0.0263(12)  | 0.0220(11)  | -0.0004(9)  | 0.0133(9)   | 0.0046(9)   |
| C4  | 0.0159(9)   | 0.0192(10)  | 0.0125(9)   | -0.0031(8)  | 0.0069(8)   | -0.0010(8)  |
| C5  | 0.0187(10)  | 0.0196(10)  | 0.0189(10)  | -0.0008(8)  | 0.0091(8)   | 0.0013(8)   |
| C6  | 0.0232(11)  | 0.0238(11)  | 0.0225(11)  | 0.0049(9)   | 0.0075(9)   | 0.0003(9)   |
| C10 | 0.0196(10)  | 0.0156(10)  | 0.0146(9)   | 0.0022(8)   | 0.0114(8)   | 0.0032(8)   |
| C11 | 0.0230(11)  | 0.0227(11)  | 0.0204(10)  | -0.0067(9)  | 0.0130(9)   | -0.0002(9)  |
| C12 | 0.0151(9)   | 0.0154(10)  | 0.0122(9)   | 0.0005(8)   | 0.0070(8)   | 0.0006(8)   |
| C13 | 0.0158(10)  | 0.0168(10)  | 0.0126(9)   | -0.0005(7)  | 0.0078(8)   | 0.0000(7)   |
| C8  | 0.0172(10)  | 0.0182(10)  | 0.0150(9)   | 0.0039(8)   | 0.0106(8)   | 0.0053(8)   |
| C7  | 0.0166(10)  | 0.0294(12)  | 0.0191(10)  | -0.0002(9)  | 0.0097(9)   | 0.0066(9)   |
| C9  | 0.0198(10)  | 0.0184(10)  | 0.0152(9)   | 0.0025(8)   | 0.0127(8)   | 0.0060(8)   |

**Table S15.** Hydrogen atomic coordinates and isotropic atomic displacement parameters ( $\text{\AA}^2$ ) for **1**.

|      | x/a    | y/b    | z/c    | U(eq) |
|------|--------|--------|--------|-------|
| H00J | 0.3377 | 0.1805 | 0.7979 | 0.032 |
| H00K | 0.2779 | 0.5467 | 0.7513 | 0.032 |
| H3   | 0.2806 | 0.7705 | 0.6635 | 0.027 |
| H5   | 0.4081 | 0.2703 | 0.672  | 0.023 |
| H00L | 0.4026 | 0.0418 | 0.7577 | 0.03  |
| H00B | 0.541  | 0.6551 | 0.6554 | 0.032 |
| H11  | 0.5043 | 0.5954 | 0.6947 | 0.032 |
| H00F | 0.4877 | 0.8452 | 0.6475 | 0.032 |
| H13  | 0.5579 | 0.3189 | 0.5972 | 0.018 |
| H00G | 0.2895 | 0.3246 | 0.4088 | 0.032 |
| H00H | 0.2714 | 0.4224 | 0.4635 | 0.032 |
| H00I | 0.2868 | 0.1263 | 0.4613 | 0.032 |
